# Supplementary material for: A processable, scalable, and stable full-color ultralong afterglow system based on heteroatom-free hydrocarbon doped polymers
Source: Royal Society of Chemistry journal article supplement (doi:10.1039/d2mh00998f), 2022-10-23
Supplement: d2mh00998f19.pdf [file d2mh00998f19.pdf]

## Supporting Information

### **A Processable, Scalable, and Stable Full-Color Ultralong Afterglow System Based on Heteroatom-Free Hydrocarbons Doped Polymers**

*Xiaoxin Zheng, Quanxiang Han, Qinglian Lin, Cuicui Li, Jinke Jiang, Qing Guo, Xin Ye, Wang Zhang Yuan, Yang Liu,\* and Xutang Tao\**

X. X. Zheng, Q. X. Han, Q. L. Lin, C. C. Li, J. K. Jiang, Dr. Q. Guo, Dr. X. Ye, Prof. Y. Liu and Prof. X. T. Tao

State Key Laboratory of Crystal Materials, Institute of Crystal Materials, Shandong University, Jinan 250100, PR China

E-mail: liuyangicm@sdu.edu.cn, and txt@sdu.edu.cn

Prof. W. Z. Yuan

School of Chemistry and Chemical Engineering, Frontiers Science Center for Transformative Molecules, Shanghai Key Lab of Electrical Insulation and Thermal Aging, Shanghai Jiao Tong University, Shanghai, 200240, China

#### **Characterization**

<sup>1</sup>H NMR spectra and <sup>13</sup>C NMR spectra were recorded on a 400 MHz Bruker AVANCE III spectrometer. Element analysis was carried out by an Element Vario EL Cube element analyzer. MALDI-TOF-MS analysis was measured on a Bruker ultrafleXtreme MALDI-TOF/TOF. UV-vis spectra were measured on a Shimadzu UV-2600. Powder X-ray diffraction (PXRD) was performed on a Bruker D8 ADVANCE X-ray diffractometer. The single-crystal X-ray diffraction data were collected on a Bruker SMART APEX II CCD area detector of a D8 goniometer at 298 K. Fluorescence, phosphorescence spectra, and phosphorescence lifetime were measured by Edinburgh Instruments FLS980 fluorescence spectrometer with a Xe lamp as the excitation source. The total quantum yield was measured by the matching integrating sphere. The phosphorescence quantum yield was calculated according to the following formula:

$$\Phi_{phos} = \frac{B}{A} \times \Phi_{PL}$$

In the formula, A, B, and  $\Phi$  are the integrated area of the total luminescence spectrum and phosphorescence spectrum, the total quantum yield, and the phosphorescence quantum yield. The fluorescence lifetime is measured using EPL-375/EPLED-300 laser as the excitation light source. In the photoactive process, the excitation light (365 nm and 254 nm) intensity used in this study was 300 mW/cm<sup>2</sup>.

#### **Theoretical calculation**

Using the Gaussian program, these three molecules were optimized with dispersion corrected density functional theory (DFT-D3) at the PBE0-D3/def2-SVP level. In order to investigate the photophysical properties of these molecules, the excited electronic structures were calculated at the PBE0-D3/def2-TZVP level with the time-dependent density functional theory (TDDFT) method. The natural transition orbits (NTOs) and the contributions of molecular orbital transitions were obtained by electron excitation analysis from the transition density matrix of TD-DFT calculation using the Multiwfn program<sup>[1]</sup> The spin-orbit coupling (SOC) matrix elements were calculated using the spin-orbit mean-field (SOME) methods based on the excited-state wave functions obtained from TDDFT calculations. These calculations were performed using ORCA 4.2.1 program<sup>[2, 3]</sup>

### Reagents and materials

The poly(methyl methacrylate) (PMMA, No defined molecular weight, Product No. M0088, 2.0 to 4.0 mPa\*s(10 mg/mL THF, 20 °C)), 1-indanone, and hexaphenylbenzene obtained from Tokyo Chemical Industry (TCI). The polycarbonate (PC, average Mw ~26,000 by GPC) was purchased from Macklin Inc. Unless otherwise stated, all chemicals and reagents were used as received from chemical companies without any further purification.

### Synthesis

Compounds truxene and hexabenzocoronene were synthesized as below.<sup>[4]</sup>

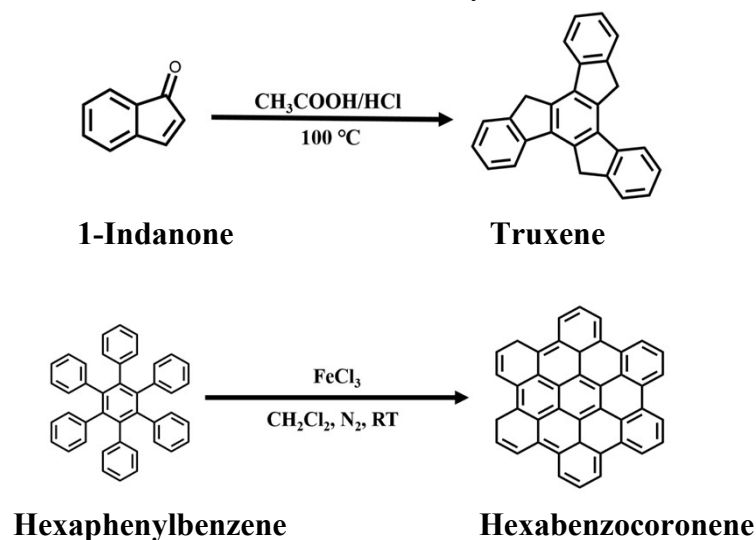

**Truxene:** 1-indanone (13.2 g 100 mmol) was added to the mixture of acetic and concentrated aqueous hydrochloric acids (2:1), then the solution was stirred at 100 °C for 16 hours. When the cooled solution was poured into ice water, the precipitate was obtained. The solid precipitate was washed with water and acetone to give a white powder with a 98% yield. <sup>1</sup>H NMR (400 MHz, CDCl<sub>3</sub>) δ: 7.91 (d, 3H), 7.65 (d, 3H), 7.46 (t, 3H), 7.35 (t, 3H), 4.22 (s, 6H). <sup>13</sup>C NMR (125 MHz, CDCl<sub>3</sub>) δ: 142.78, 140.68, 136.08, 134.17, 125.91, 125.28, 124.12, 120.87, 35.53. MALDI-TOF-MS (m/z): 342.137, calc. 342.14. Elemental analysis calculated for C<sub>27</sub>H<sub>18</sub> (%): C 94.70, H 5.30;

found (%): C 94.60, H 5.16.

**Hexabenzocoronene:** 1.6 g (3 mmol) hexaphenylbenzene and 100 ml CH<sub>2</sub>Cl<sub>2</sub> were put into a 250 ml flask, and the solution was agitated and bubbled with nitrogen for 30 minutes. 2.4 g FeCl<sub>3</sub> was dissolved in 10 ml degassed CH<sub>3</sub>NO<sub>2</sub> before being injected dropwise into the hexaphenylbenzene solution. The reactants were stirred for 4 hours with nitrogen bubbling after the addition of FeCl<sub>3</sub>. The reaction was then quenched using CH<sub>3</sub>OH, resulting in the precipitate. The precipitate was filtered and washed with acetone, water, and hydrochloric acid (1.0 mol/L) in that order. About 1.5 g (2.85 mmol) powder was produced after vacuum drying. The yield of hexabenzocoronene is about 95%. <sup>13</sup>C NMR (15 kHz, solid) δ: 110-140. MALDI-TOF-MS (m/z): 522.062, calc. 522.14. Elemental analysis calculated for C<sub>42</sub>H<sub>18</sub> (%): C 96.53, H 3.47; found (%): C 96.04, H 3.80.

### Preparation of the RTP materials

Using CH<sub>2</sub>Cl<sub>2</sub> as the solvent, the raw solutions of PMMA, truxene, coronene, hexabenzocoronene, and perylene red with the concentrations 200 mg/ml, 1mg/ml, 0.5mg/ml, 0.01mg/ml, and 1mg/ml, respectively were prepared.

**The inks:** Dissolve 2.0 mg truxene into 10 mL 200 mg/ml PMMA solution to obtain the ink of T-PMMA. Likewise, dissolve 2.0 mg coronene into 10 mL 200 mg/ml PMMA solution to obtain the ink of C-PMMA and dissolve 2.0 mg coronene and 2.0 mg perylene red into 10 mL 200 mg/ml PMMA solution to obtain the ink of P-C-PMMA.

**The films:** The solutions (containing 2 g PMMA and the corresponding chromophores) ratio-mixed by the raw solutions were placed in an evaporating dish with a flat bottom, then left for 48 hours to evaporate the solvent and solidify the doping systems. The photophysical properties were investigated after drying for 12 hours at 100 °C. The films can also be obtained by melt process. Mix PMMA with corresponding chromophores in molten state at 250 °C by vigorous and repeated agitation. Then put the doped PMMA into the Hot Press, and after pressing, the corresponding films can be obtained.

**The fibers:** The obtained doped PMMA were heated to molten and then drawn into fibers at 250 °C.

**The 3D objects:** Take 25 g of newly distilled methyl methacrylate (MMA) and 30mg of BPO into a conical flask. then, gently shake the flask until all of the BPO has dissolved. The resultant mixture was heated to 60 °C for hours under nitrogen until it is as sticky as glycerin. Cool the reactants quickly to room temperature to stop the reaction. Then, pour the cooled reactants into the mold and continue the reaction for 24 hours at 40 °C under nitrogen. Finally, the reactants were treated at 100 °C for 3 hours. After removing the molds, various shapes of RTP 3D objects could be obtained.

**Table S1.** RTP properties of polymer-based materials with long-lived lifetime (>100 ms).

| No. | Doped polymer |             | $\lambda_{em}$ (nm) | $\tau_{Phos}$ (ms) | $\Phi_{Phos}$ (%) | Refs.               |
|-----|---------------|-------------|---------------------|--------------------|-------------------|---------------------|
|     | polymer       | chromophore |                     |                    |                   |                     |
| 1   | PMMA          | G1          | 530                 | 208                | 50.0              | ref <sup>[5]</sup>  |
| 2   | PMMA          | G2          | 541                 | 230                | 3.1               | ref <sup>[6]</sup>  |
| 3   | PMMA          | G3          | 541                 | 230                | 3.9               | ref <sup>[6]</sup>  |
| 4   | PMMA          | G4          | 564                 | 5580               | 1.7               | ref <sup>[7]</sup>  |
| 5   | PMMA          | G5          | 565                 | 23000              | 12.0              | ref <sup>[7b]</sup> |
| 6   | PMMA          | G6          | 521                 | 700                | 4.6               | ref <sup>[8]</sup>  |
| 7   | PMMA          | G7          | 516                 | 330                | 5.7               | ref <sup>[8]</sup>  |
| 8   | PMMA          | G8          | 544                 | 680                | 1.2               | ref <sup>[8]</sup>  |
| 9   | PMMA          | G9          | 542                 | 176                | <1                | ref <sup>[8]</sup>  |
| 10  | PMMA          | G10         | 546                 | 600                | -                 | ref <sup>[9]</sup>  |
| 11  | PMMA          | G11         | 508                 | 500                | -                 | ref <sup>[9]</sup>  |
| 12  | PMMA          | G12         | 440                 | 900                | -                 | ref <sup>[9]</sup>  |
| 13  | PMMA          | G13         | 486                 | 600                | -                 | ref <sup>[9]</sup>  |
| 14  | PMMA          | G14         | 484                 | 1880               | 3.7               | ref <sup>[10]</sup> |
| 15  | PMMA          | G15         | 487                 | 750                | 5.4               | ref <sup>[10]</sup> |
| 16  | PMMA          | G16         | 482                 | 1740               | 5.4               | ref <sup>[10]</sup> |
| 17  | PMMA          | G17         | 486                 | 2150               | 2.7               | ref <sup>[10]</sup> |
| 18  | PMMA          | G18         | 523                 | 580                | 4.1               | ref <sup>[11]</sup> |
| 19  | PLA           | G19         | 488                 | 581                | -                 | ref <sup>[12]</sup> |
| 20  | PLA           | G20         | 505                 | 386                | -                 | ref <sup>[12]</sup> |
| 21  | PLA           | G21         | 504                 | 214                | -                 | ref <sup>[12]</sup> |
| 22  | PLA           | G22         | 541                 | 520                | -                 | ref <sup>[12]</sup> |
| 23  | PLA           | G23         | 541                 | 424                | -                 | ref <sup>[12]</sup> |
| 24  | PLA           | G24         | 526                 | 612                | -                 | ref <sup>[12]</sup> |
| 25  | PLA           | G25         | 520                 | 194                | -                 | ref <sup>[13]</sup> |
| 26  | PLA           | G26         | 511                 | 178                | -                 | ref <sup>[13]</sup> |
| 27  | PLA           | G27         | 532                 | 340                | -                 | ref <sup>[13]</sup> |
| 28  | PLA           | G28         | 534                 | 135                | -                 | ref <sup>[13]</sup> |
| 29  | PLA           | G29         | 531                 | 188                | -                 | ref <sup>[13]</sup> |
| 30  | PLA           | G30         | 541                 | 813                | -                 | ref <sup>[14]</sup> |
| 31  | PLA           | G31         | 544                 | 341                | -                 | ref <sup>[14]</sup> |
| 32  | PLA           | G32         | 572                 | 137                | -                 | ref <sup>[15]</sup> |
| 33  | PLA           | G33         | 557                 | 109.7              | -                 | ref <sup>[15]</sup> |
| 34  | PLA           | G34         | 489                 | 255                | -                 | ref <sup>[16]</sup> |
| 35  | PLA           | G35         | 543                 | 270                | -                 | ref <sup>[16]</sup> |
| 36  | PLA           | G36         | 567                 | 295                | -                 | ref <sup>[16]</sup> |
| 37  | PLA           | G37         | 452                 | 113                | -                 | ref <sup>[16]</sup> |
| 38  | PVA           | G38         | 527                 | 109.3              | 1.5               | ref <sup>[17]</sup> |
| 39  | PVA           | G39         | 519                 | 700                | 27.0              | ref <sup>[18]</sup> |
| 40  | PVA           | G40         | 525                 | 820                | 23.7              | ref <sup>[18]</sup> |
| 41  | PVA           | G41         | 460                 | 1210               | 16.0              | ref <sup>[18]</sup> |

|            |                         |     |                                       |                                      |                                     |                      |
|------------|-------------------------|-----|---------------------------------------|--------------------------------------|-------------------------------------|----------------------|
| 42         | PVA                     | G42 | 420                                   | 240                                  | 2.6                                 | ref <sup>[18]</sup>  |
| 43         | PVA                     | G43 | 500                                   | 900                                  | 9.4                                 | ref <sup>[18]</sup>  |
| 44         | PVA                     | G44 | 500                                   | 200                                  | 0.5                                 | ref <sup>[18]</sup>  |
| 45         | PVA                     | G45 | 500                                   | 567                                  | 2.4                                 | ref <sup>[19]</sup>  |
| 46         | PVA                     | G46 | 501                                   | 585                                  | 4.8                                 | ref <sup>[19]</sup>  |
| 47         | PVA                     | G47 | 500                                   | 730                                  | <1                                  | ref <sup>[19]</sup>  |
| 48         | PVA                     | G48 | 532                                   | 2460                                 | 23.4                                | ref <sup>[20]</sup>  |
| 49         | PVA                     | G49 | 450                                   | 2260                                 | 17.5                                | ref <sup>[20b]</sup> |
| 50         | PVA                     | G50 | 450                                   | 72.07                                | 36.8                                | ref <sup>[20b]</sup> |
| 51         | PVA                     | G51 | 480                                   | 750                                  | 11.2                                | ref <sup>[21]</sup>  |
| 52         | PVA                     | G52 | 488                                   | 828.8                                | 5.0                                 | ref <sup>[22]</sup>  |
| 53         | PVA                     | G53 | 460                                   | 190                                  | 11.9                                | ref <sup>[23]</sup>  |
| 54         | PVA                     | G54 | 460                                   | 450                                  | 15.0                                | ref <sup>[23]</sup>  |
| 55         | PVA                     | G55 | 460                                   | 420                                  | 5.1                                 | ref <sup>[23]</sup>  |
| 56         | PVA                     | G56 | 440                                   | 990                                  | 6.1                                 | ref <sup>[24]</sup>  |
| 57         | PVA                     | G57 | 434                                   | 1290                                 | 1.0                                 | ref <sup>[24]</sup>  |
| 58         | PAN                     | G58 | 487                                   | 968.1                                | 0.6                                 | ref <sup>[25]</sup>  |
| 59         | PAN                     | G59 | 540                                   | 301.7                                | 6.1                                 | ref <sup>[25]</sup>  |
| 60         | PAN                     | G60 | 553                                   | 245.1                                | 2.1                                 | ref <sup>[25]</sup>  |
| 61         | PAN                     | G61 | 617                                   | 100.2                                | 0.2                                 | ref <sup>[25]</sup>  |
| 62         | PVA                     | G62 | 463                                   | 1720                                 | 8.2                                 | ref <sup>[26]</sup>  |
| 63         | PVA                     | G63 | 480                                   | 1810                                 | 19.8                                | ref <sup>[26]</sup>  |
| 64         | P(VAc-co-AA)            | G64 | 470                                   | 1866                                 | 55.99                               | ref <sup>[27]</sup>  |
| 65         | PA6                     | G65 | 525                                   | 747                                  | 14.7                                | ref <sup>[28]</sup>  |
| 66         | PVA                     | G66 | 488                                   | 2044.86                              | 2.8                                 | ref <sup>[29]</sup>  |
| 67         | PMMA                    | G67 | 530                                   | 122.44                               | 3.47                                | ref <sup>[30]</sup>  |
| 68         | PMMA                    | G68 | ~520                                  | 576.4                                | 57.4                                | ref <sup>[31]</sup>  |
| 69         | PMMA                    | G69 | ~520                                  | 589.2                                | 56.2                                | ref <sup>[31]</sup>  |
| 70         | PMMA                    | G70 | ~520                                  | 529.3                                | 56.0                                | ref <sup>[31]</sup>  |
| 71         | PMMA                    | G71 | ~520                                  | 453.7                                | 54.9                                | ref <sup>[31]</sup>  |
| 72         | PMMA                    | G72 | ~520                                  | 265.9                                | 27.2                                | ref <sup>[31]</sup>  |
| 73         | PMMA                    | G73 | 516                                   | 770                                  | 33.31                               | ref <sup>[32]</sup>  |
| 74         | PMMA                    | G74 | 510                                   | 1510                                 | 42.05                               | ref <sup>[32]</sup>  |
| 75         | PMMA                    | G75 | 514                                   | 250                                  | 10.02                               | ref <sup>[32]</sup>  |
| 76         | PMMA                    | G76 | 530                                   | 260                                  | 18.14                               | ref <sup>[32]</sup>  |
| 77         | PMMA                    | G77 | 537                                   | 1640                                 | 20.43                               | ref <sup>[32]</sup>  |
| 78         | PMMA                    | G78 | ~550                                  | 406                                  | -                                   | ref <sup>[33]</sup>  |
| 79         | PVA                     | G79 | 470                                   | 3290                                 | 33.1                                | ref <sup>[34]</sup>  |
| <b>No.</b> | <b>Modified polymer</b> |     | <b><math>\lambda_{em}</math> (nm)</b> | <b><math>\tau_{Phos}</math> (ms)</b> | <b><math>\Phi_{Phos}</math> (%)</b> | <b>Refs.</b>         |
| 80         | P1                      |     | 475                                   | 2430                                 | 7.51                                | ref <sup>[35]</sup>  |
| 81         | P2                      |     | 500/527                               | 2160                                 | 2.26                                | ref <sup>[36]</sup>  |
| 82         | P3                      |     | 501/530                               | 1830                                 | 4.03                                | ref <sup>[36]</sup>  |

|            |                        |                                       |                                      |                                     |                      |
|------------|------------------------|---------------------------------------|--------------------------------------|-------------------------------------|----------------------|
| 83         | P4                     | 505/530                               | 1700                                 | 7.52                                | ref <sup>[36]</sup>  |
| 84         | P5                     | 510/534                               | 1990                                 | 4.30                                | ref <sup>[36]</sup>  |
| 85         | P6                     | 498                                   | 401                                  | 10.4                                | ref <sup>[37]</sup>  |
| 86         | P7                     | 480                                   | 2139                                 | -                                   | ref <sup>[38]</sup>  |
| 87         | P8                     | 500                                   | 1007                                 | -                                   | ref <sup>[39]</sup>  |
| 88         | P9                     | 509                                   | 170                                  | -                                   | ref <sup>[40]</sup>  |
| 89         | P10                    | 445/517/<br>547                       | 428/949/1<br>096                     | 23.2                                | ref <sup>[41]</sup>  |
| 90         | P11                    | 447/514                               | 578/609                              | -                                   | ref <sup>[41]</sup>  |
| 91         | P12                    | 396/444                               | 150/166                              | 1.7                                 | ref <sup>[42]</sup>  |
| 92         | P13                    | 436                                   | 615                                  | 0.6                                 | ref <sup>[42]</sup>  |
| 93         | P14                    | 458/486                               | 391/576                              | 7.6                                 | ref <sup>[42]</sup>  |
| 94         | P15                    | 496                                   | 637                                  | 0.1                                 | ref <sup>[42]</sup>  |
| 95         | P16                    | 505/542/<br>580                       | 450/577/4<br>23                      | 0.3                                 | ref <sup>[42]</sup>  |
| 96         | P17                    | 538                                   | 1039                                 | 4.3                                 | ref <sup>[42]</sup>  |
| 97         | P18                    | 490/516/<br>616/667/<br>730           | 63/80/170/<br>122/95                 | 0.3                                 | ref <sup>[42]</sup>  |
| 98         | P19                    | 414                                   | 4200                                 | 10                                  | ref <sup>[43]</sup>  |
| <b>No.</b> | <b>TS-FRET polymer</b> | <b><math>\lambda_{em}</math> (nm)</b> | <b><math>\tau_{Phos}</math> (ms)</b> | <b><math>\Phi_{Phos}</math> (%)</b> | <b>Refs.</b>         |
| 99         | P1+F1                  | 533                                   | 1600                                 | 51.68                               | ref <sup>[35]</sup>  |
| 100        | P1+F2                  | 581                                   | 1900                                 | 60.88                               | ref <sup>[35]</sup>  |
| 101        | G48+PVA+F3             | 610                                   | 1330                                 | 25.65                               | ref <sup>[20a]</sup> |
| 102        | G48+PVA+F4             | 560                                   | 870                                  | 52.64                               | ref <sup>[20a]</sup> |
| 103        | P19+ F5                | 560                                   | 1700                                 | 30.5                                | ref <sup>[43]</sup>  |
| 104        | P19+ F6                | 502                                   | 1800                                 | 36.0                                | ref <sup>[43]</sup>  |
| 105        | P19+ F7                | 570                                   | 1500                                 | 20.8                                | ref <sup>[43]</sup>  |
| 106        | P19+ F2                | 620                                   | 2200                                 | 27.9                                | ref <sup>[43]</sup>  |
| 107        | G79+PVA+F8             | 650                                   | 600                                  | -                                   | ref <sup>[34]</sup>  |
| 108        | G79+PVA+F2             | 590                                   | 860                                  | -                                   | ref <sup>[34]</sup>  |
| 109        | G79+PVA+F8+F9          | 810                                   | 200                                  | 0.4                                 | ref <sup>[34]</sup>  |

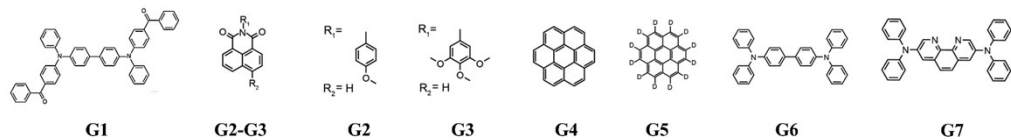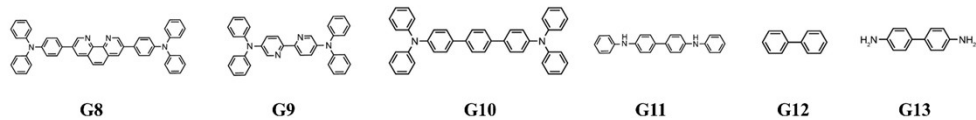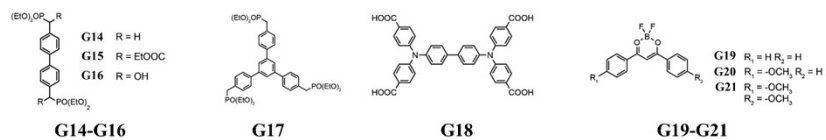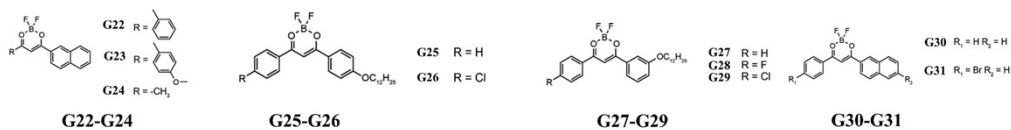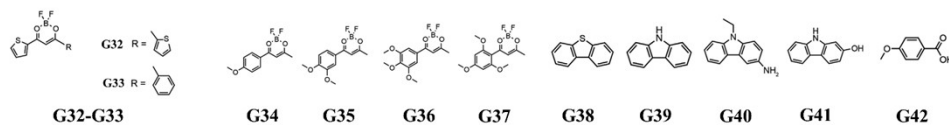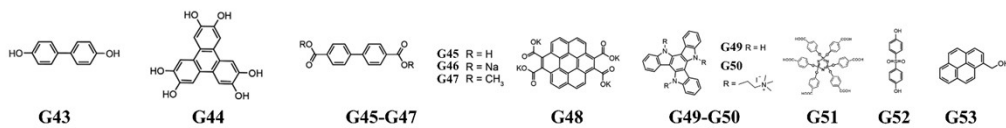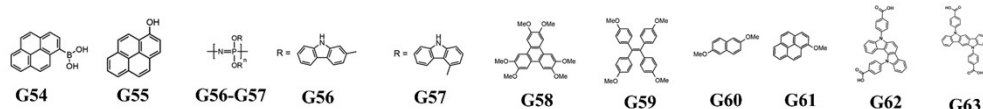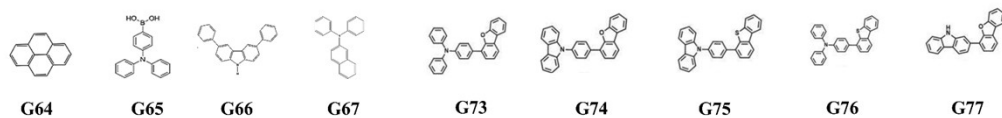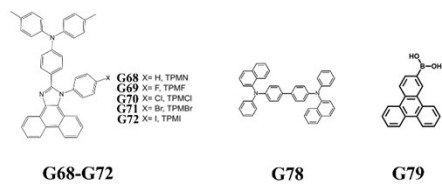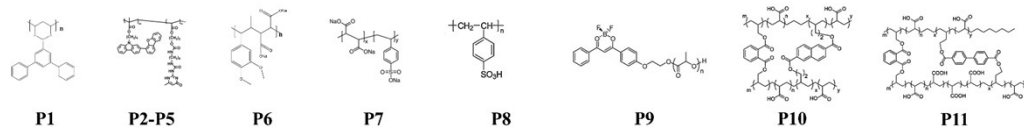

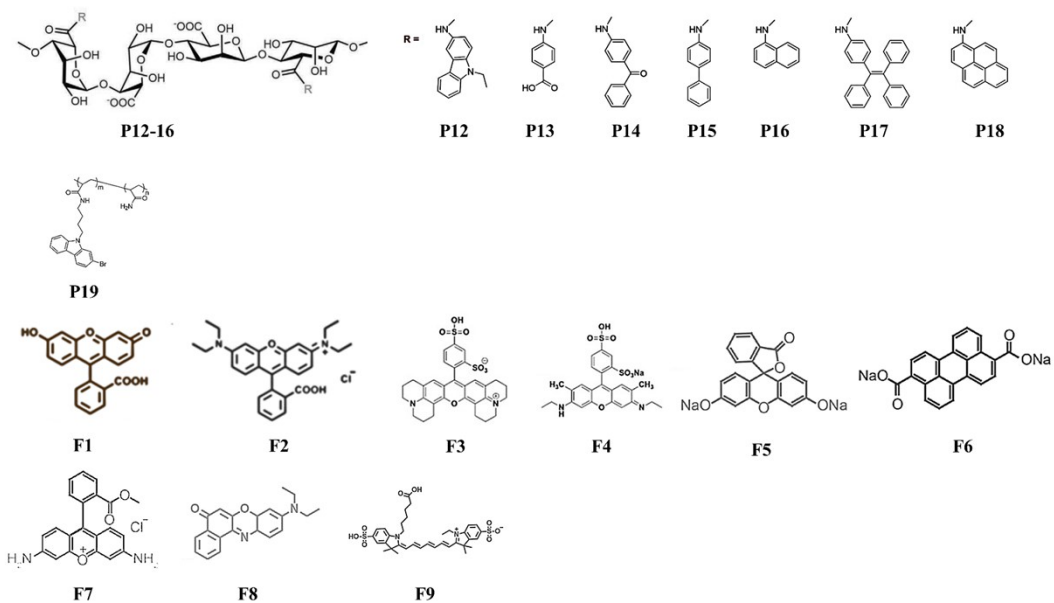

**Fig. S1.** Molecular structures of polymer-based materials with long-lived lifetime (>100 ms).

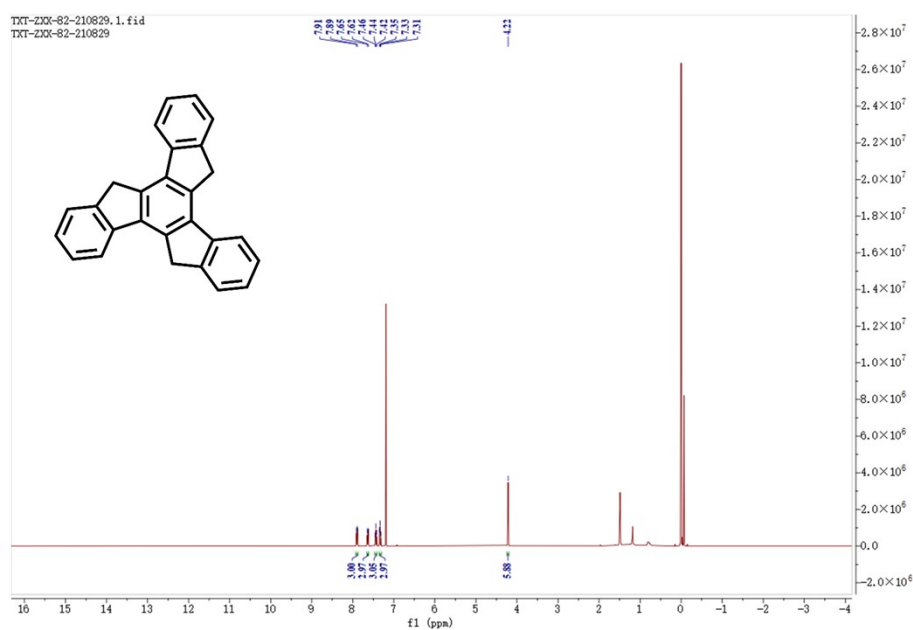

**Fig. S2.** <sup>1</sup>H NMR spectrum of Truxene in CDCl<sub>3</sub>.



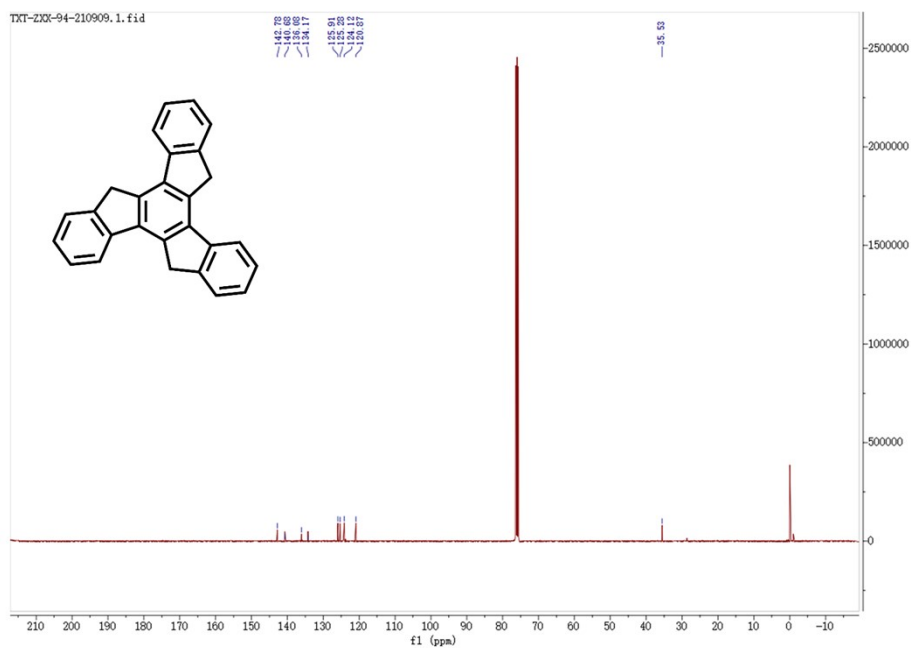

Fig. S3.  $^{13}\text{C}$  NMR spectrum of truxene in  $\text{CDCl}_3$ .

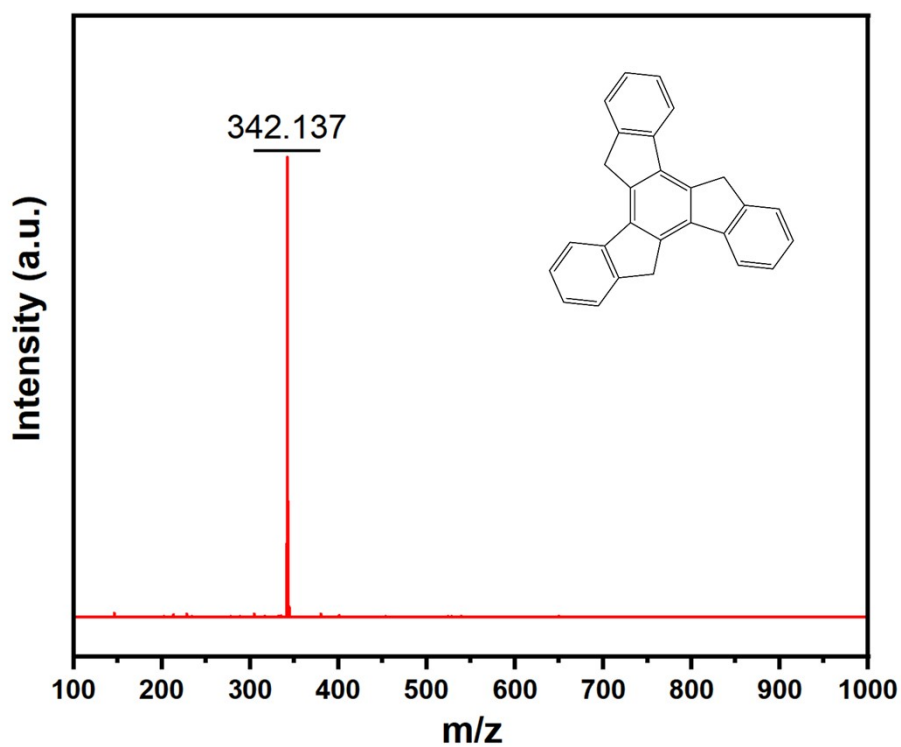

Fig. S4. MALDI-TOF-MS spectrum of truxene.

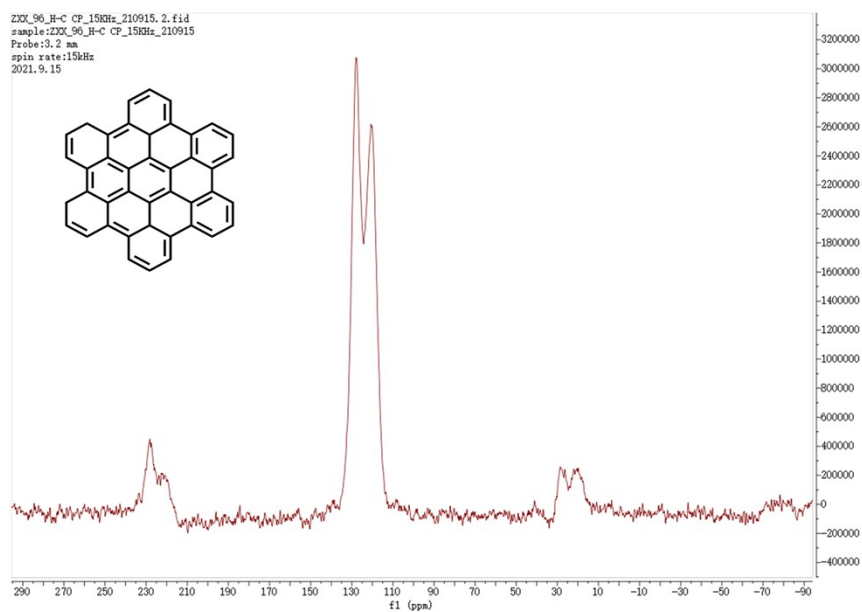

**Fig. S5.**  $^{13}\text{C}$  NMR (solid) spectrum of hexabenzocoronene.

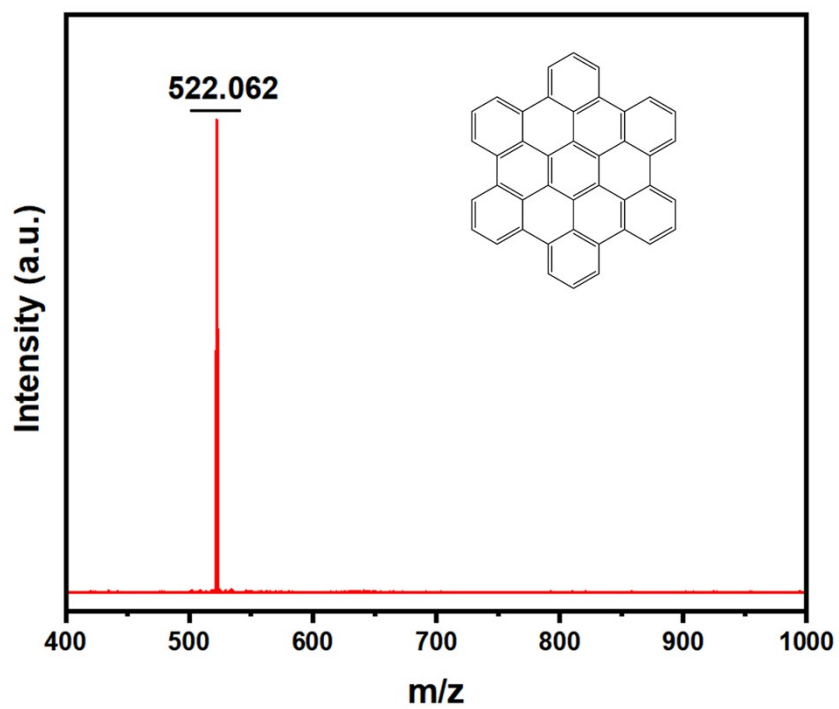

**Fig. S6.** MALDI-TOF-MS spectrum of hexabenzocoronene.

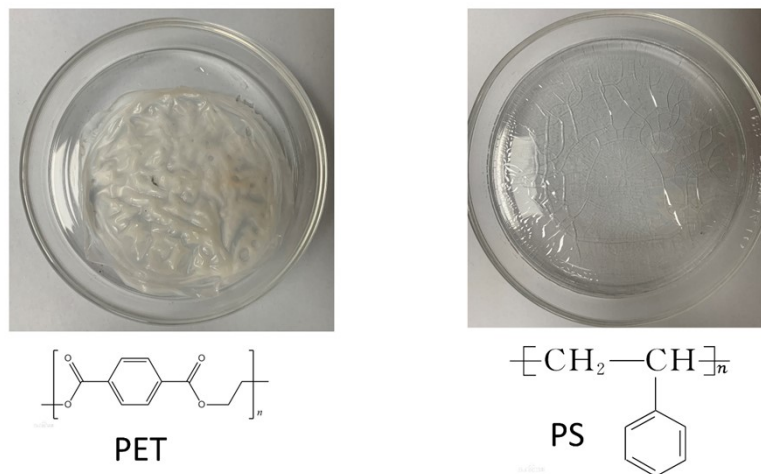

**Fig. S7.** The doped films of PET and PS constructed by solution method.

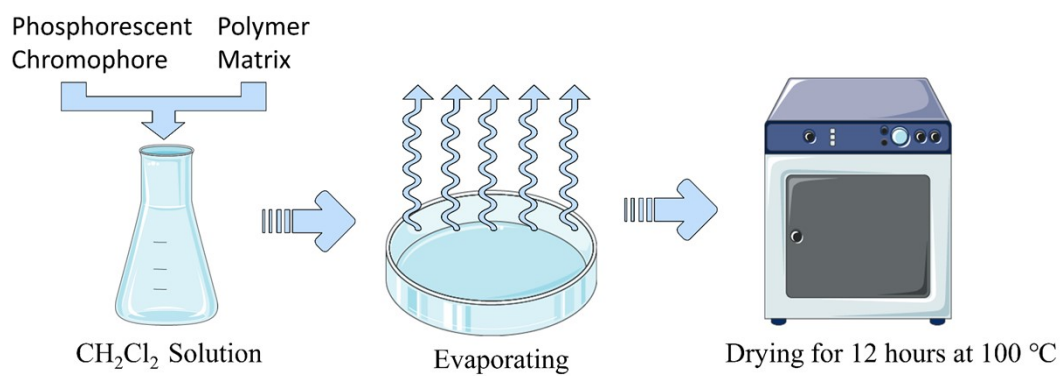

**Fig. S8.** Schematic illustration of the solution method for compatibility determination.

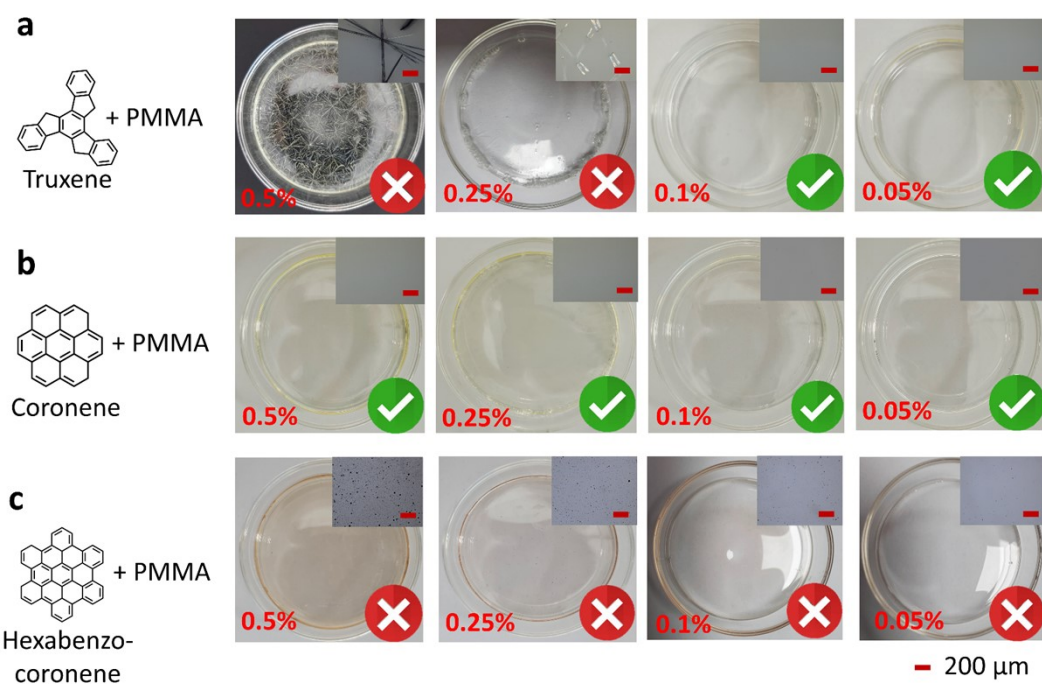

**Fig. S9.** The compatibility of PMMA and chromophores.

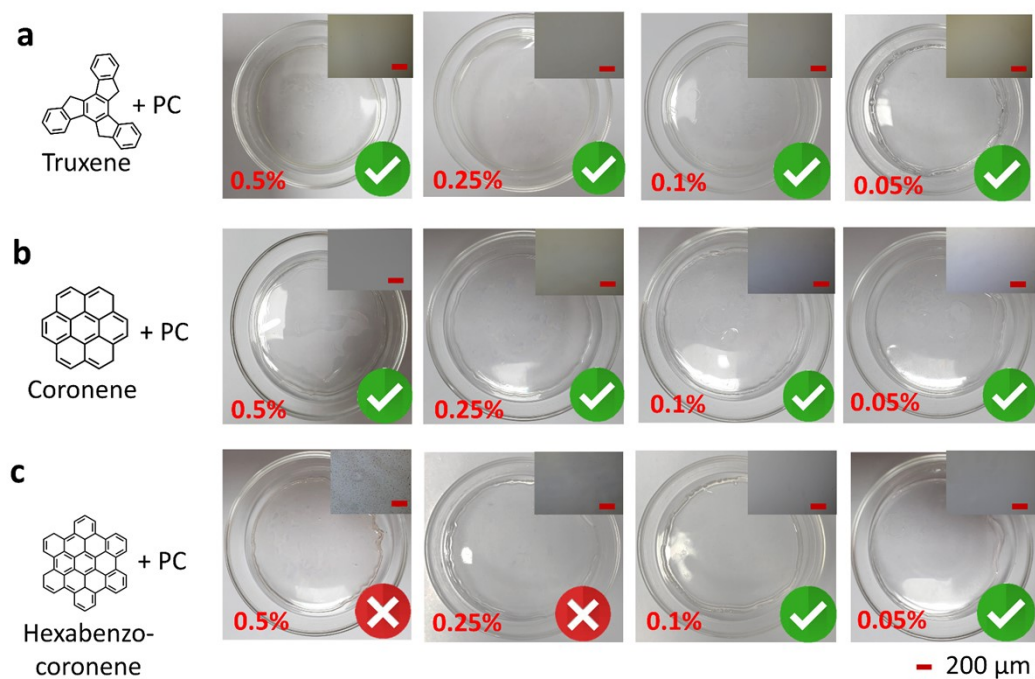

**Fig. S10.** The compatibility of PC and chromophores.

**Table S2.** The compatibility of PC/PMMA and chromophores.

|  | PMMA |       |      |       | PC   |       |      |       |
|--|------|-------|------|-------|------|-------|------|-------|
|  | 0.5% | 0.25% | 0.1% | 0.05% | 0.5% | 0.25% | 0.1% | 0.05% |

|                          |     |     |     |     |     |     |     |     |
|--------------------------|-----|-----|-----|-----|-----|-----|-----|-----|
| <b>Truxene</b>           | NO  | NO  | YES | YES | YES | YES | YES | YES |
| <b>Coronene</b>          | YES |
| <b>Hexabenzocoronene</b> | NO  | NO  | NO  | NO  | NO  | NO  | YES | YES |

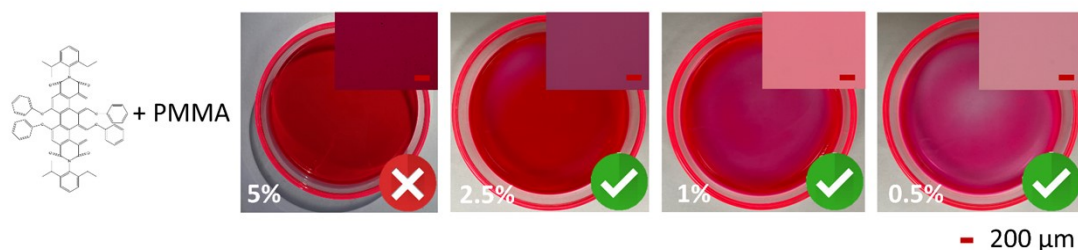

**Fig. S11.** The compatibility of PMMA and perylene red.

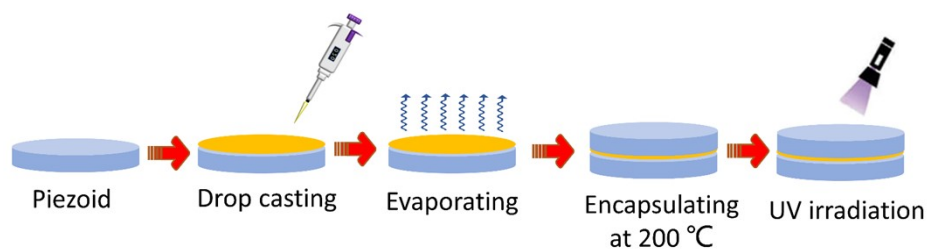

**Fig. S12.** Scheme of fabrication and encapsulation process of the PMMA/PC films doped with chromophore.

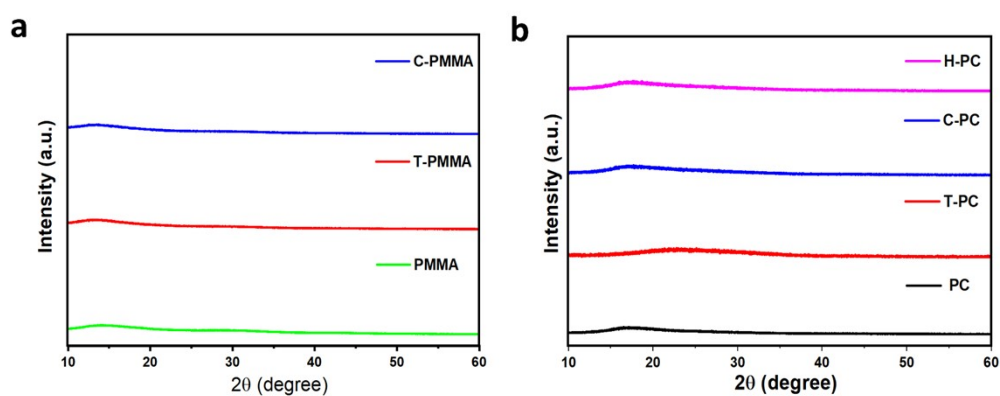

**Fig. S13.** The powder X-ray diffraction (PXRD) of (a) C-PMMA, T-PMMA, PMMA and (b) H-PC, C-PC, T-PC, PC.

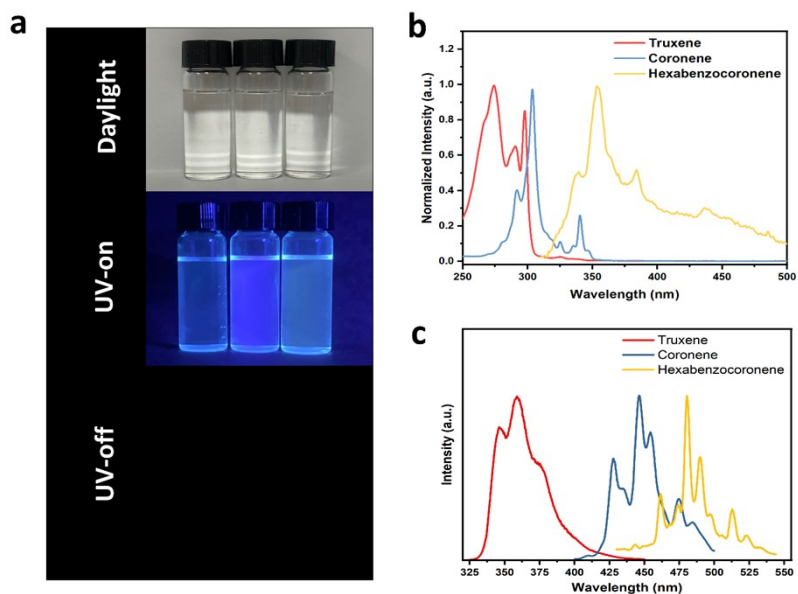

**Fig. S14.** (a) Photographs of the truxene, coronene and hexabenzocoronene solutions under the daylight, before and after turning off the excitation light. (b) The absorption spectra of truxene, coronene and hexabenzocoronene solutions. (c) The steady-state photoluminescence spectra of truxene, coronene and hexabenzocoronene solutions.

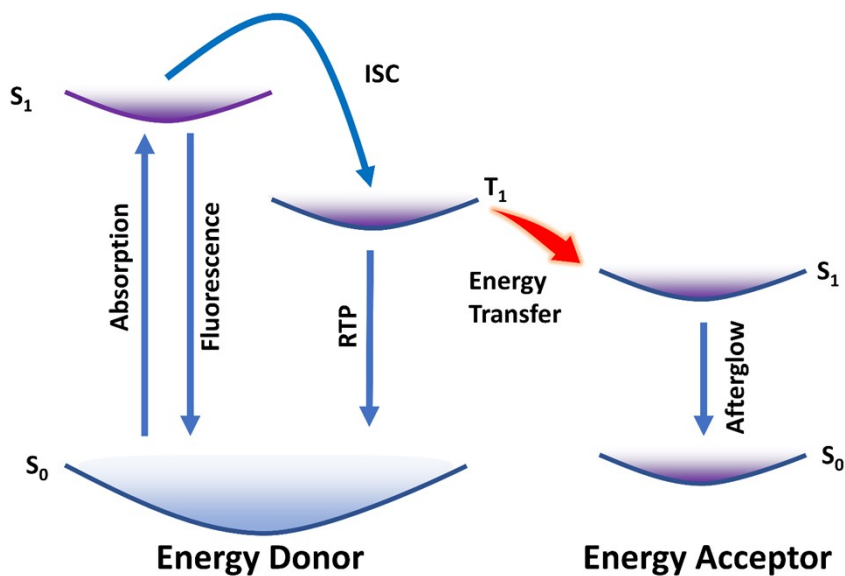

**Fig. S15.** Simplified Jablonski diagram to explain the phosphorescence energy transfer (ISC = intersystem crossing, RTP = room temperature phosphorescence).

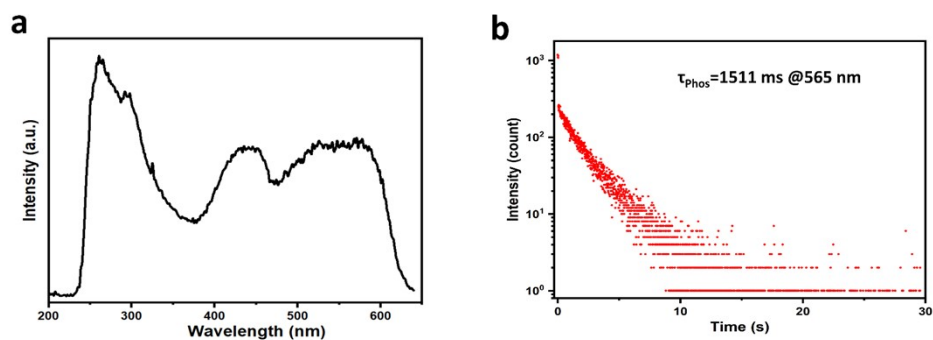

**Fig. S16.** (a) The excitation spectra of P-PMMA (perylene red doped PMMA, the concentration of perylene red is 0.1 wt %,  $\lambda_{\text{em}} = 650 \text{ nm}$ ). (b) Phosphorescence lifetime decay profile of P-C-PMMA at 565 nm.

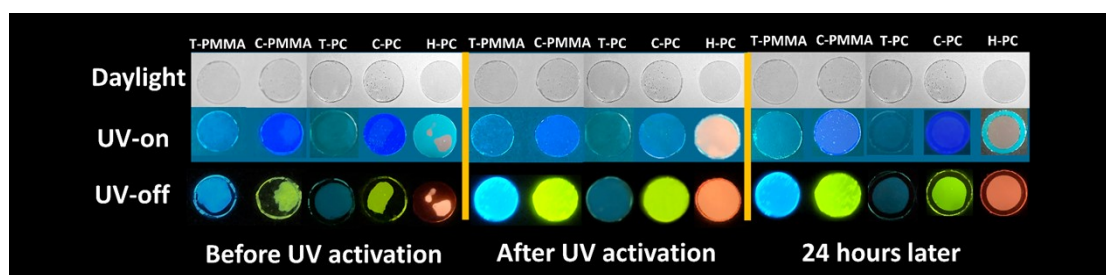

**Fig. S17.** Corresponding time-dependent photographs of the doped PMMA/PC films taken before UV activation/after UV activation/24 hours later process.

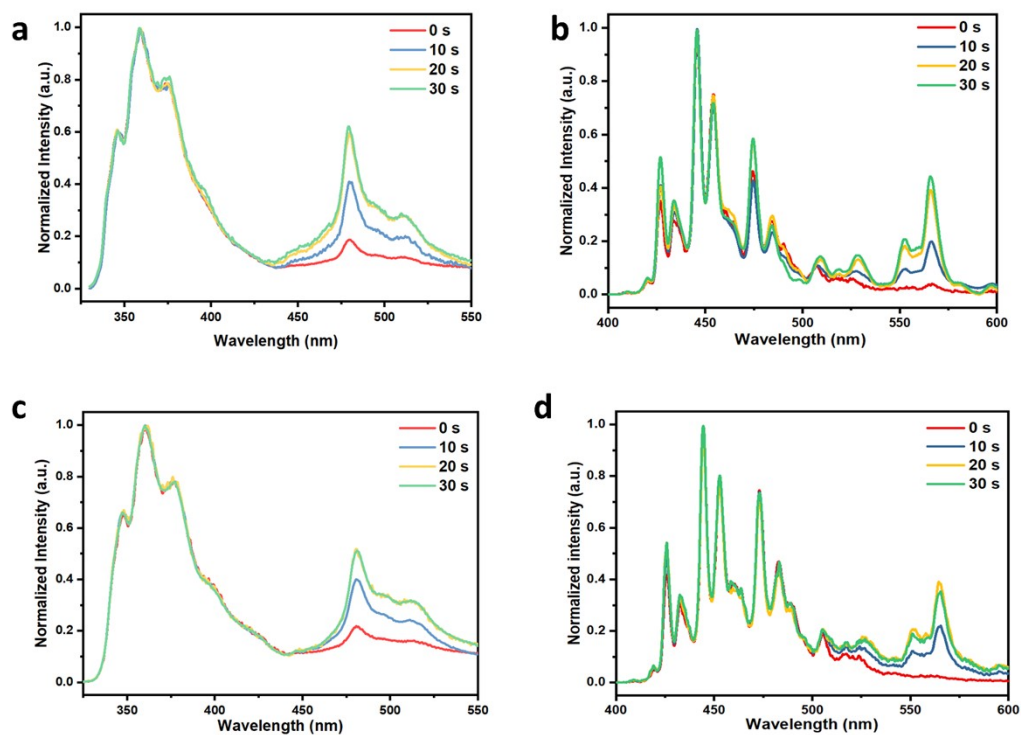

**Fig. S18** The steady-state photoluminescence spectra for (a)T-PMMA, (b)C-PMMA,

(c)T-PC and (d)C-PC during the UV-irradiation process.

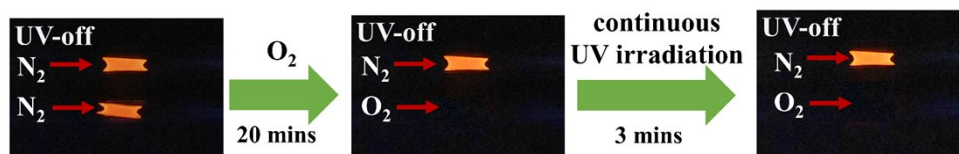

**Fig. S19.** Photographs of the H-PC exposed to O<sub>2</sub> and N<sub>2</sub> after turning off the UV irradiation.

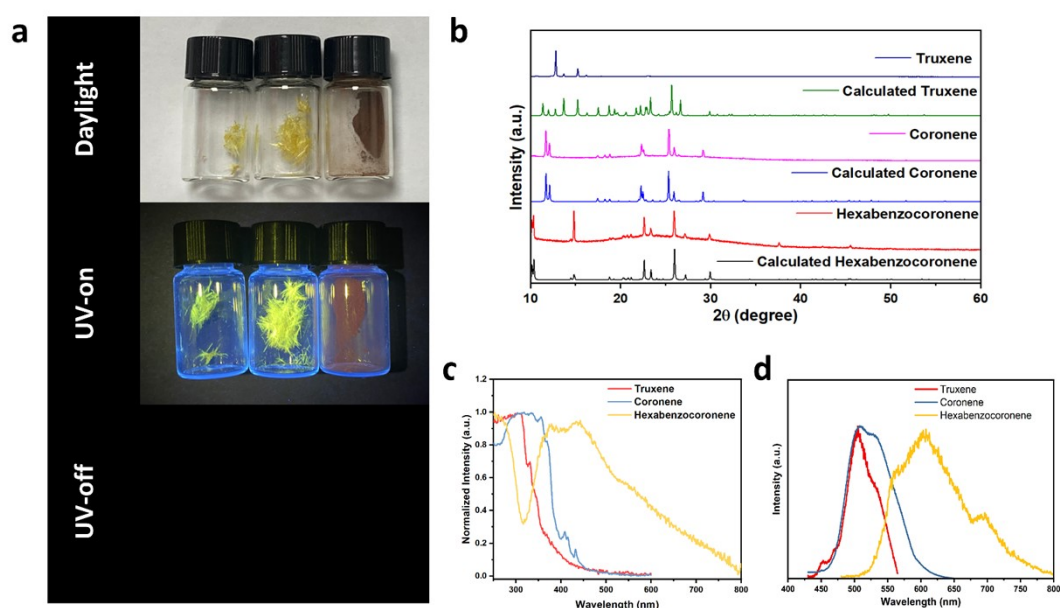

**Fig. S20.** (a) Photographs of the truxene, coronene and hexabenzocoronene crystals under the daylight, before and after turning off the excitation light. (b) The powder X-ray diffraction (PXRD) of truxene, coronene and hexabenzocoronene crystals. (c) The absorption spectra of truxene, coronene and hexabenzocoronene crystals. (d) The steady-state photoluminescence spectra of truxene, coronene and hexabenzocoronene crystals.

**Table S3.** Detailed Single-Crystal Structural Information of truxene, coronene and hexabenzocoronene crystals.

|                   | Truxene                         | Coronene                       | Hexabenzocoronene               |
|-------------------|---------------------------------|--------------------------------|---------------------------------|
| Empirical formula | C <sub>27</sub> H <sub>18</sub> | C <sub>12</sub> H <sub>6</sub> | C <sub>42</sub> H <sub>18</sub> |
| Formula weight    | 342.41                          | 150.17                         | 522.56                          |
| Temperature       | 300(2) K                        | 293(2) K                       |                                 |
| Wavelength        | 1.54178 Å                       | 1.54184 Å                      | 0.71073                         |
| Crystal system    | Monoclinic                      | Monoclinic                     | Monoclinic                      |
| Space group       | P 21/c                          | P 21/c                         | P 21/c                          |



|                                         |                                                                                                                  |                                                                                                                   |                                                                                                 |
|-----------------------------------------|------------------------------------------------------------------------------------------------------------------|-------------------------------------------------------------------------------------------------------------------|-------------------------------------------------------------------------------------------------|
| <b>Unit cell dimensions</b>             | a = 4.8045(4) Å,<br>b = 15.5425(15) Å,<br>c = 23.249(2) Å,<br>alpha = 90°,<br>beta = 92.476(6)°,<br>gamma = 90°. | a = 10.0981(5) Å,<br>b = 4.6964(2) Å,<br>c = 15.6980(10) Å<br>alpha = 90°,<br>beta = 106.070(6)°,<br>gamma = 90°. | a=18.431(3),<br>b=5.119(1),<br>c=12.929(2),<br>alpha =90°,<br>beta =112.57(1) °,<br>gamma =90°. |
| <b>Volume</b>                           | 1734.5(3) Å <sup>3</sup>                                                                                         | 715.39(7) Å <sup>3</sup>                                                                                          | 1126.4 Å <sup>3</sup>                                                                           |
| <b>Z</b>                                | 4                                                                                                                | 4                                                                                                                 | 2                                                                                               |
| <b>Density (calculated)</b>             | 1.311 g/cm <sup>3</sup>                                                                                          | 1.394 g/cm <sup>3</sup>                                                                                           | 1.541 g/cm <sup>3</sup>                                                                         |
| <b>Absorption coefficient</b>           | 0.563 mm <sup>-1</sup>                                                                                           | 0.605 mm <sup>-1</sup>                                                                                            |                                                                                                 |
| <b>F(000)</b>                           | 720                                                                                                              | 312                                                                                                               | 540                                                                                             |
| <b>Crystal size</b>                     | 0.20 x 0.10 x 0.10 mm <sup>3</sup>                                                                               | 0.03 x 0.03 x 0.02 mm <sup>3</sup>                                                                                |                                                                                                 |
| <b>Theta range for data collection</b>  | 3.42 to 68.35°.                                                                                                  | 4.687 to 67.033°.                                                                                                 |                                                                                                 |
| <b>Index ranges</b>                     | -5<=h<=5,<br>-13<=k<=18,<br>-25<=l<=27                                                                           | -12<=h<=12,<br>-5<=k<=3,<br>-16<=l<=18                                                                            |                                                                                                 |
| <b>Reflections collected</b>            | 12727                                                                                                            | 3718                                                                                                              |                                                                                                 |
| <b>Independent reflections</b>          | 3100 [R(int) = 0.0865]                                                                                           | 1268 [R(int) = 0.0453]                                                                                            |                                                                                                 |
| <b>Completeness</b>                     | 97.40%                                                                                                           | 98.60%                                                                                                            |                                                                                                 |
| <b>Absorption correction</b>            | Semi-empirical from<br>equivalents                                                                               | Semi-empirical from<br>equivalents                                                                                |                                                                                                 |
| <b>Max. and min. transmission</b>       | 0.9459 and 0.8958                                                                                                | 1.00000 and 0.93756                                                                                               |                                                                                                 |
| <b>Refinement method</b>                | Full-matrix least-squares<br>on F2                                                                               | Full-matrix least-squares on<br>F2                                                                                |                                                                                                 |
| <b>Data / restraints / parameters</b>   | 3100 / 0 / 245                                                                                                   | 1268 / 0 / 110                                                                                                    |                                                                                                 |
| <b>Goodness-of-fit on F<sup>2</sup></b> | 1.042                                                                                                            | 1.08                                                                                                              |                                                                                                 |
| <b>Final R indices [I&gt;2sigma(I)]</b> | R1 = 0.0960,<br>wR2 = 0.2701                                                                                     | R1 = 0.0635,<br>wR2 = 0.1639                                                                                      | 0.0560( 0)<br>0.0560( 0)                                                                        |
| <b>R indices (all data)</b>             | R1 = 0.1179,<br>wR2 = 0.2875                                                                                     | R1 = 0.0762,<br>wR2 = 0.1774                                                                                      |                                                                                                 |
| <b>Extinction coefficient</b>           | 0.030(4)                                                                                                         | 0.014(3)                                                                                                          |                                                                                                 |
| <b>Largest diff. peak and hole</b>      | 0.415 and -0.296 e.Å <sup>-3</sup>                                                                               | 0.306 and -0.255 e.Å <sup>-3</sup>                                                                                |                                                                                                 |
| <b>Data sources</b>                     | Our work                                                                                                         | Our work                                                                                                          | Ref. <sup>[44]</sup>                                                                            |

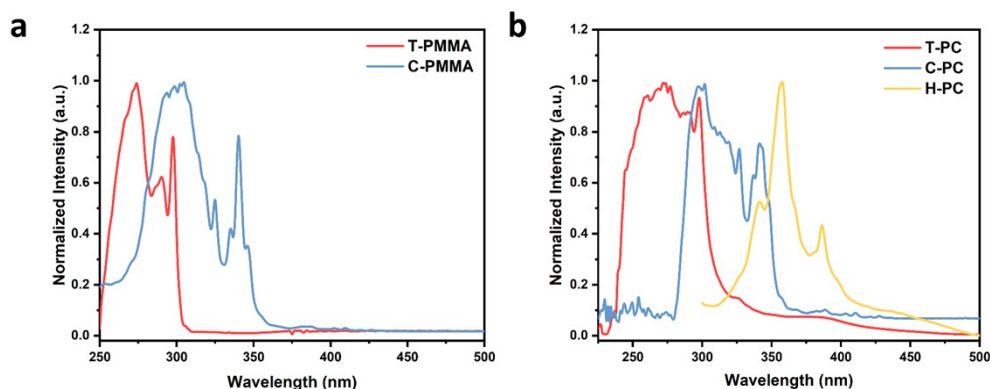

**Fig. S21.** (a) The absorption spectra of T-PMMA and C-PMMA. (b) The absorption spectra of T-PC, C-PC and H-PC.

**Table S4.** The singlet and triplet excited state transition configurations of isolated truxene revealed by TD-DFT calculations. The matched excited states that contain the same orbital transition components of  $S_1$  and  $|S_1 - T_n| < 0.3$  eV were highlighted in red.

| Truxene                                                                 |                       |           |                                                                                                                           |
|-------------------------------------------------------------------------|-----------------------|-----------|---------------------------------------------------------------------------------------------------------------------------|
| Singlet excited state                                                   | Triplet excited state | Energy    | Transition configuration (%)                                                                                              |
| $S_1$<br>3.9590 eV,<br>H → L 55.3%,<br>H-1 → L+1 32.9%,<br>H → L+1 5.3% | $T_1$                 | 2.6210 eV | H → L+1 37.3%, H-1 → L 31.4%, H → L 7.3%, H-1 → L+1 5.4%                                                                  |
|                                                                         | $T_2$                 | 3.1680 eV | H → L 26.0%, H-1 → L+1 17.2%, H-1 → L 5.9%, H-2 → L+1 5.3%                                                                |
|                                                                         | $T_3$                 | 3.2110 eV | H-1 → L 24.5%, H → L+1 22.7%, H → L 5.7%, H-2 → L 5.1%                                                                    |
|                                                                         | $T_4$                 | 3.7090 eV | H → L 41.9%, H → L+1 13.5%, H-1 → L+3 5.2%                                                                                |
|                                                                         | $T_5$                 | 3.7530 eV | H-1 → L+1 16.1%, H-1 → L 11.6%, H-2 → L+2 7.7%, H-3 → L+5 5.7%, H → L+1 5.4%, H-2 → L+1 5.1%                              |
|                                                                         | $T_6$                 | 3.8170 eV | H-1 → L+1 25.1%, H-1 → L 12.9%, H → L 10.9%, H-4 → L+4 6.7%                                                               |
|                                                                         | $T_7$                 | 3.8680 eV | H-1 → L+1 24.4%, H → L+1 6.8%, H-5 → L+2 5.9%, H-2 → L+2 5.8%, H-4 → L+5 5.5%                                             |
|                                                                         | $T_8$                 | 4.2230 eV | H → L+2 19.8%, H → L+4 14.2%, H → L+5 12.4%, H → L+3 10.2%, H-5 → L+1 5.5%                                                |
|                                                                         | $T_9$                 | 4.2530 eV | H-1 → L+2 14.1%, H-2 → L+1 10.7%, H → L+4 10.5%, H-5 → L 7.9%, H-3 → L 6.8%, H-2 → L 6.4%, H-3 → L+3 5.4%, H-3 → L+1 5.4% |
|                                                                         | $T_{10}$              | 4.2990 eV | H-1 → L+3 13.8%, H-1 → L+2 11.8%, H-2 → L 11.1%, H → L+5 7.3%, H-1 → L+5 7.3%, H-2 → L+5 6.1%, H-3 → L                    |

**Table S5.** The singlet and triplet excited state transition configurations of isolated coronene revealed by TD-DFT calculations. The matched excited states that contain the same orbital transition components of  $S_1$  and  $|S_1-T_n| < 0.3$  eV were highlighted in red.

| Coronene                                                                                            |                       |           |                                                                                                                          |
|-----------------------------------------------------------------------------------------------------|-----------------------|-----------|--------------------------------------------------------------------------------------------------------------------------|
| Singlet excited state                                                                               | Triplet excited state | Energy    | Transition configuration (%)                                                                                             |
|                                                                                                     | T <sub>1</sub>        | 2.1810 eV | H → L 23.0%, H-1 → L+1 23.0%, H-1 → L 19.7%, H → L+1 19.7%                                                               |
|                                                                                                     | T <sub>2</sub>        | 3.0110 eV | H → L+1 41.6%, H-1 → L 41.6%, H-1 → L+1 6.9%, H → L 6.9%                                                                 |
|                                                                                                     | T <sub>3</sub>        | 3.0110 eV | H-1 → L+1 41.6%, H → L 41.5%, H-1 → L 6.9%, H → L+1 6.9%                                                                 |
|                                                                                                     | T <sub>4</sub>        | 3.1580 eV | H → L+1 26.6%, H-1 → L 26.5%, H → L 22.7%, H-1 → L+1 22.6%                                                               |
| S <sub>1</sub><br>3.3070 eV,<br>H-1 → L 26.7%,<br>H → L+1 26.7%,<br>H → L 22.8%,<br>H-1 → L+1 22.8% | T <sub>5</sub>        | 3.5170 eV | H → L+3 15.6%, H-1 → L+2 15.5%, H-3 → L 8.3%, H-2 → L+1 8.3%, H-5 → L+1 7.2%, H-1 → L+4 7.1%, H → L+5 6.5%, H-4 → L 5.5% |
|                                                                                                     | T <sub>6</sub>        | 3.5180 eV | H-1 → L+3 15.6%, H → L+2 15.6%, H-2 → L 8.3%, H-3 → L+1 8.3%, H-5 → L 7.2%, H → L+4 7.0%, H-1 → L+5 6.5%, H-4 → L+1 5.4% |
|                                                                                                     | T <sub>7</sub>        | 3.7640 eV | H-2 → L 17.3%, H-3 → L+1 17.2%, H-1 → L+3 16.1%, H → L+2 16.0%, H-1 → L+2 12.8%, H → L+3 12.7%                           |
|                                                                                                     | T <sub>8</sub>        | 4.0600 eV | H → L+3 20.1%, H-1 → L+2 20.1%, H → L+2 16.0%, H-1 → L+3 16.0%, H-3 → L 12.4%, H-2 → L+1 12.4%                           |
|                                                                                                     | T <sub>9</sub>        | 4.3020 eV | H-1 → L+4 38.2%, H-5 → L+1 15.4%, H-4 → L 14.1%, H → L+5 9.0%, H-5 → L 5.9%, H-4 → L+1 5.4%                              |
|                                                                                                     | T <sub>10</sub>       | 4.3020 eV | H → L+4 38.2%, H-5 → L 15.5%, H-4 → L+1 14.1%, H-1 → L+5 9.1%, H-5 → L+1 6.0%, H-4 → L 5.4%                              |

**Table S6.** The singlet and triplet excited state transition configurations of isolated hexabenzocoronene revealed by TD-DFT calculations. The matched excited states that contain the same orbital transition components of  $S_1$  and  $|S_1-T_n| < 0.3$  eV were highlighted in red.

| Hexabenzocoronene     |                       |        |                              |
|-----------------------|-----------------------|--------|------------------------------|
| Singlet excited state | Triplet excited state | Energy | Transition configuration (%) |

| state    |           |                                                                                                               |
|----------|-----------|---------------------------------------------------------------------------------------------------------------|
| $T_1$    | 1.9600 eV | H → L 33.7%, H-1 → L+1 33.7%, H-2 → L+2 18.6%                                                                 |
| $T_2$    | 2.5180 eV | H-1 → L+2 30.3%, H-2 → L+1 18.9%, H → L+2 16.7%, H-2 → L 9.2%                                                 |
| $T_3$    | 2.5180 eV | H → L+2 30.3%, H-2 → L 18.9%, H-1 → L+2 16.7%, H-2 → L+1 9.2%                                                 |
| $T_4$    | 2.7820 eV | H → L+1 32.4%, H-1 → L 32.3%, H → L 15.5%, H-1 → L+1 15.5%                                                    |
| $T_5$    | 2.7820 eV | H-1 → L+1 32.3%, H → L 32.3%, H-1 → L 15.5%, H → L+1 15.5%                                                    |
| $T_6$    | 2.8900 eV | H-1 → L 48.4%, H → L+1 48.4%                                                                                  |
| $T_7$    | 3.1050 eV | H-2 → L+2 43.7%, H → L+4 11.3%, H-1 → L+5 11.2%, H-1 → L+1 7.3%, H → L 7.3%, H-4 → L 7.1%, H-5 → L+1 7.1%     |
| $T_8$    | 3.3580 eV | H → L+3 18.2%, H-1 → L+4 13.9%, H → L+5 13.9%, H-3 → L 8.0%, H-4 → L+1 8.0%, H-5 → L 7.9%, H-6 → L+2 5.7%     |
| $T_9$    | 3.3580 eV | H-1 → L+3 18.1%, H-1 → L+5 14.0%, H → L+4 13.9%, H-3 → L+1 8.0%, H-5 → L+1 8.0%, H-4 → L 7.9%, H-7 → L+2 5.7% |
| $T_{10}$ | 3.3960 eV | H-2 → L 46.1%, H → L+2 42.8%                                                                                  |

$S_1$   
2.9850 eV,  
H-1 → L 49.1%,  
H → L+1 49.1%

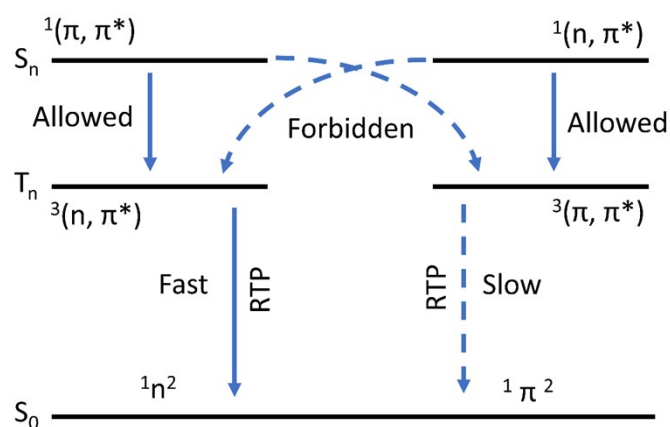

**Fig. S22.** El-Sayed rule in organic luminescence materials.

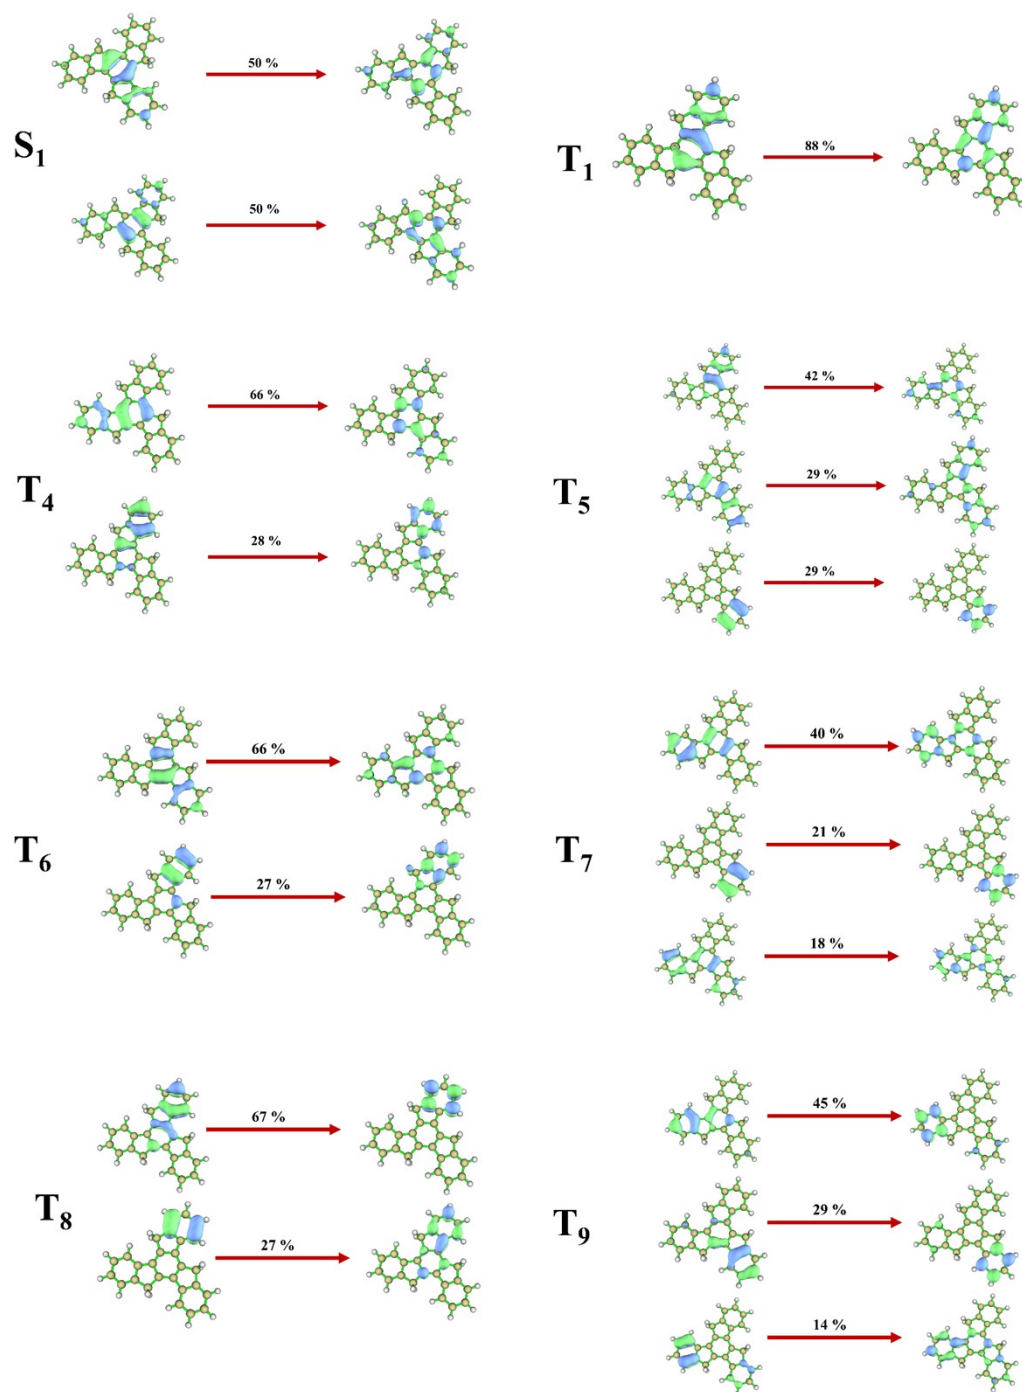

**Fig. S23.** Hole and particle pairs in natural transition orbitals (NTOs) analysis for  $S_0 \rightarrow S_1$  and  $S_0 \rightarrow T_n$  transitions of truxene. (The energy level of a triplet state ( $T_n$ ) lies within the range of  $\pm 0.3$  eV to  $E_{S_1}$ )

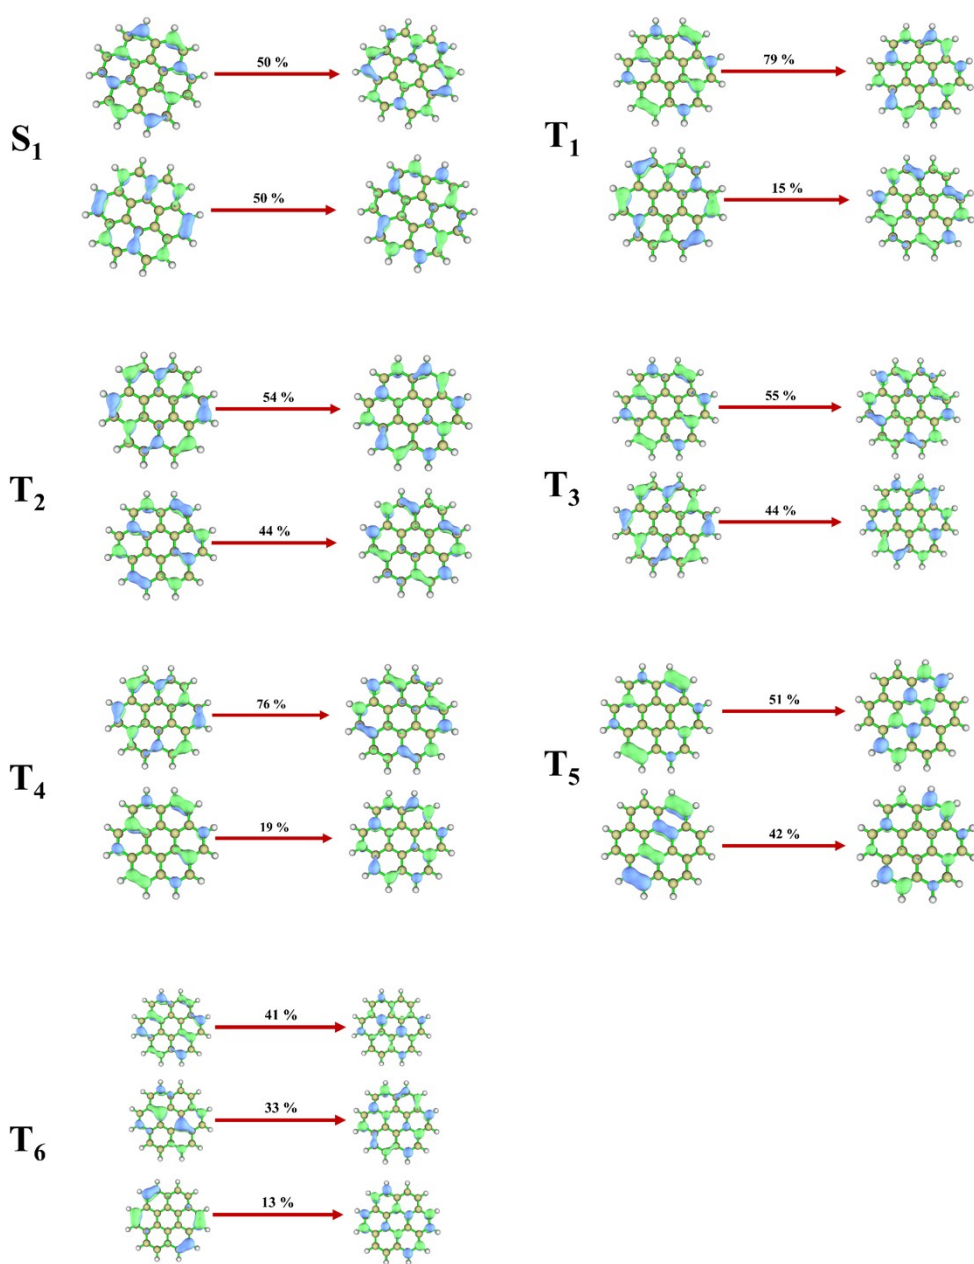

**Fig. S24.** Hole and particle pairs in natural transition orbitals (NTOs) analysis for  $S_0 \rightarrow S_1$  and  $S_0 \rightarrow T_n$  transitions of coronene. (The energy level of a triplet state ( $T_n$ ))

lies within the range of  $\pm 0.3$  eV to  $E_{S_1}$ )

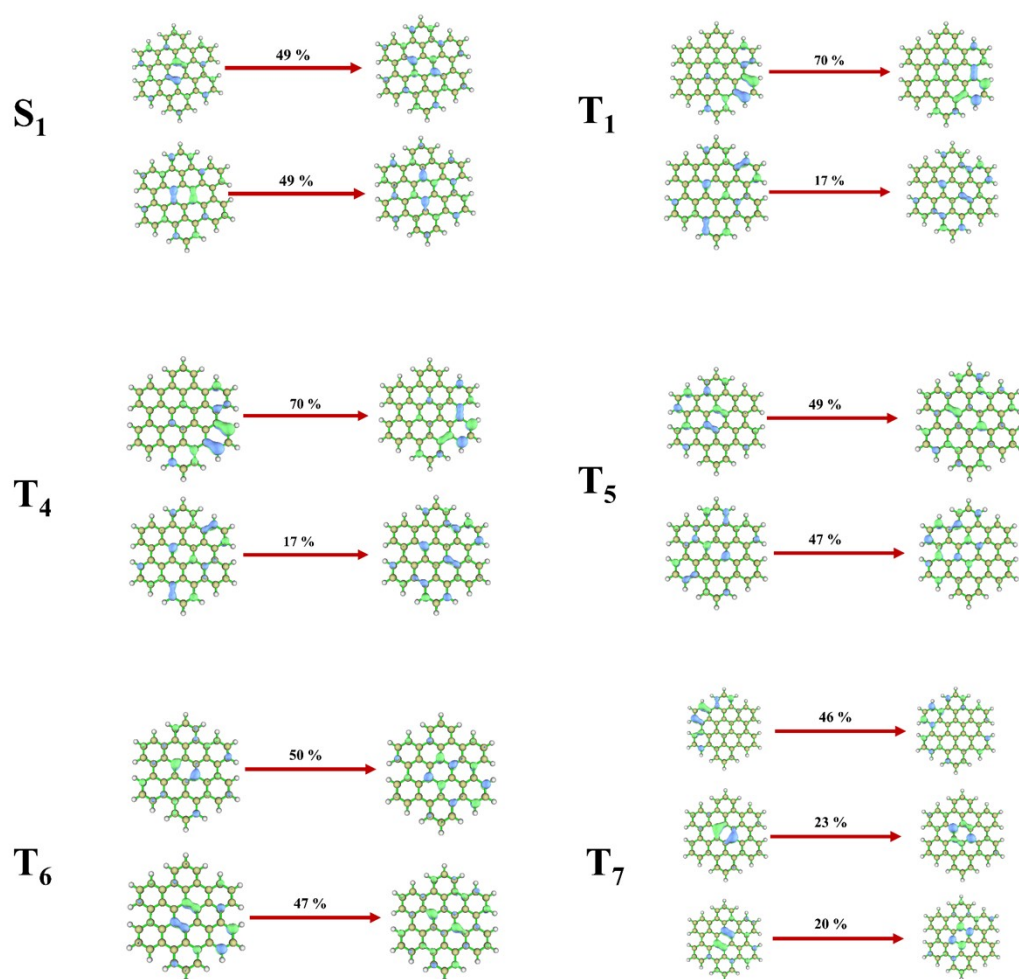

**Fig. S25.** Hole and particle pairs in natural transition orbitals (NTOs) analysis for  $S_0 \rightarrow S_1$  and  $S_0 \rightarrow T_n$  transitions of hexabenzocoronene. (The energy level of a triplet state ( $T_n$ ) lies within the range of  $\pm 0.3$  eV to  $E_{S_1}$ )

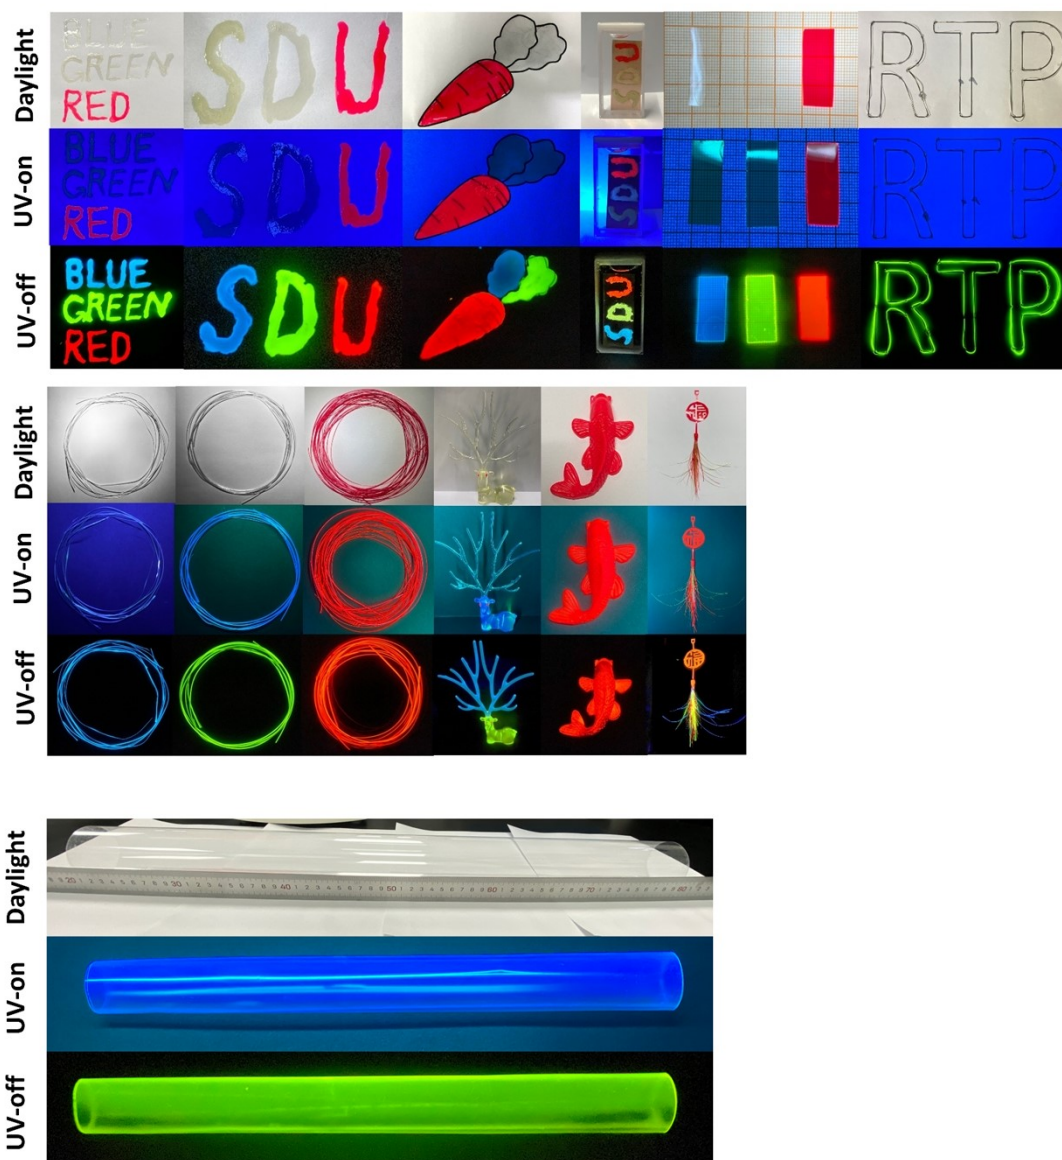

**Fig. S26.** Detailed photographs of various forms of PMMA-based RTP materials for sundry application situations.



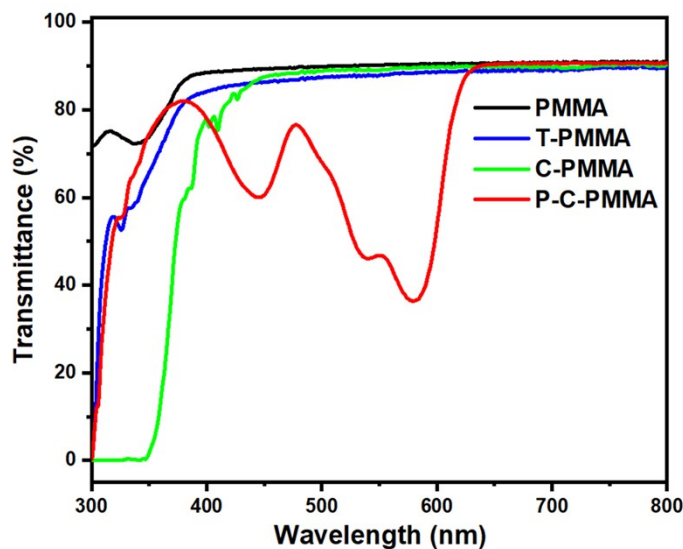

**Fig. S27.** Transmission of a pure PMMA film and T-PMMA, C-PMMA, and P-PMMA films. Their thicknesses were all about 0.6 mm.

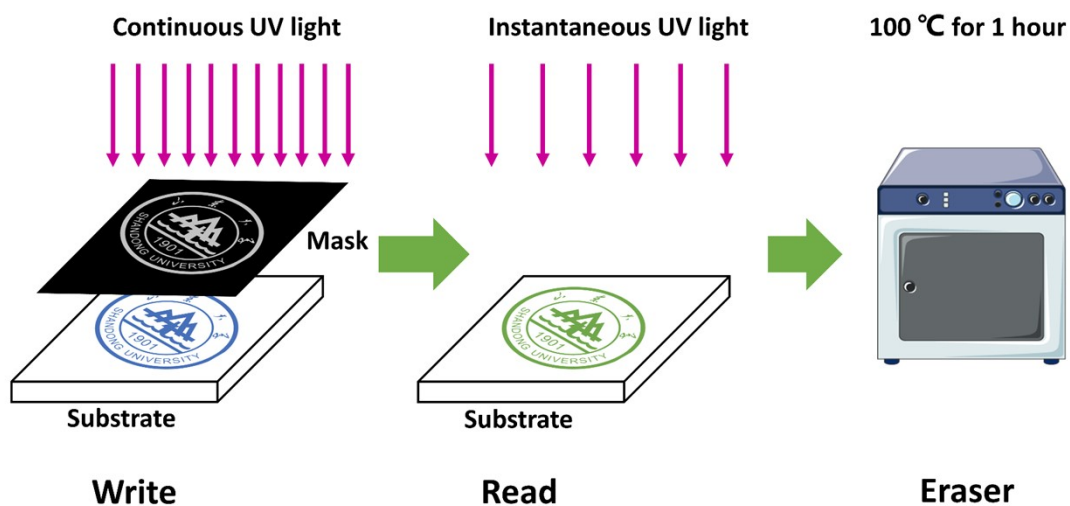

**Fig. S28.** Overview of writing, reading and erasing procedure based on RTP films. Writing: Masked UV illumination used for the pattern of the emblem of Shandong University. Reading: High luminescent contrast is achieved by phosphorescence on mask-illuminated areas in delayed emission. Erasing: By heating the sample for around 1 hour at 100 °C.

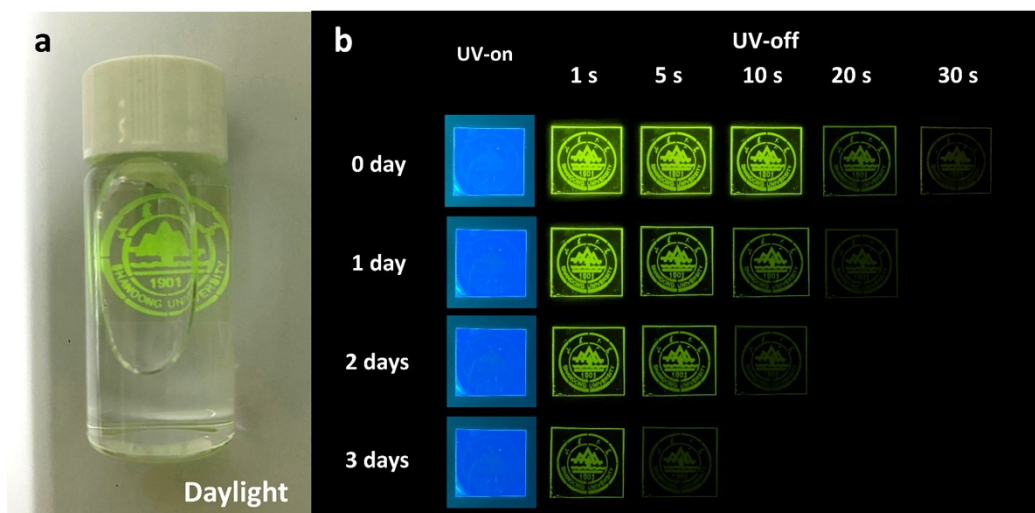

**Fig. S29.** (a) Photographs of the written afterglow patterns, in which the display of high-brightness RTP images could be achieved even in daylight. (b) Photographs of the changes in written afterglow patterns over time.

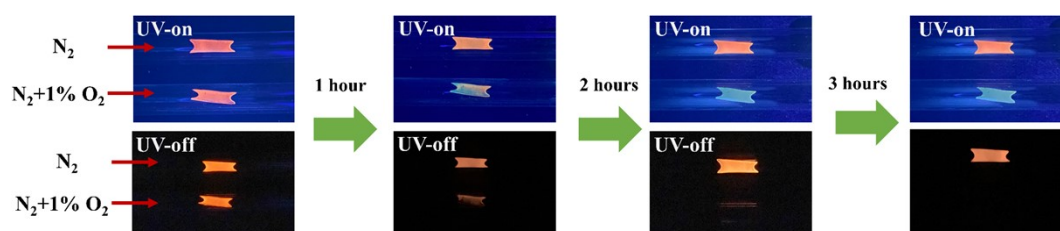

**Fig. S30.** Photographs of the H-PC oxygen monitor exposed to pure and 1% (v/v)  $O_2$  containing  $N_2$  under UV irradiation and after turning off the UV irradiation.

## References

- [1] F. Tian Lu, *Journal of Computational Chemistry* **2012**, 33, 580.
- [2] a)F. Neese, *Wiley Interdiscip. Rev.: Comput. Mol. Sci.* **2012**, 2, 73; b)F. Neese, *Wiley Interdisciplinary Reviews: Computational Molecular Science* **2018**, 8, e1327.
- [3] W. Humphrey, A. Dalke, K. Schulten, *Journal of molecular graphics* **1996**, 14, 33.
- [4] a)R. Sharma, M. B. Thomas, R. Misra, F. D'Souza, *Angew Chem Int Ed Engl* **2019**, 58, 4350; b)J. Cao, Y. M. Liu, X. Jing, J. Yin, J. Li, B. Xu, Y. Z. Tan, N. Zheng, *J Am Chem Soc* **2015**, 137, 10914.
- [5] S. Reineke, N. Seidler, S. R. Yost, F. Prins, W. A. Tisdale, M. A. Baldo, *Applied Physics Letters* **2013**, 103.
- [6] X. Chen, C. Xu, T. Wang, C. Zhou, J. Du, Z. Wang, H. Xu, T. Xie, G. Bi, J. Jiang, *Angewandte Chemie International Edition* **2016**, 55, 9872.
- [7] a)H. Mieno, R. Kabe, N. Notsuka, M. D. Allendorf, C. Adachi, *Advanced Optical Materials* **2016**, 4, 1015; b)J. L. Kropp, W. R. Dawson, *The Journal of Physical Chemistry* **1967**, 71, 4499; c)M. Wu, X. Wang, Y. Pan, J. Li, X. Li, Y. Sun, Y. Zou, H. Zhang, K. Zhang, *The Journal of Physical Chemistry C* **2021**, 125, 26986.
- [8] M. Louis, H. Thomas, M. Gmelch, A. Haft, F. Fries, S. Reineke, *Adv Mater* **2019**, 31, e1807887.
- [9] F. Fries, M. Louis, R. Scholz, M. Gmelch, H. Thomas, A. Haft, S. Reineke, *J Phys Chem A* **2020**, 124, 479.
- [10] H. Thomas, D. L. Pastoetter, M. Gmelch, T. Achenbach, A. Schlogl, M. Louis, X. Feng, S. Reineke, *Adv Mater* **2020**, 32, e2000880.
- [11] M. Louis, H. Thomas, M. Gmelch, F. Fries, A. Haft, J. Lindenthal, S. Reineke, *Advanced Optical Materials* **2020**, 8.
- [12] S. Xu, R. E. Evans, T. Liu, G. Zhang, J. N. Demas, C. O. Trindle, C. L. Fraser, *Inorg Chem* **2013**, 52, 3597.
- [13] M. L. Daly, C. Kerr, C. A. DeRosa, C. L. Fraser, *ACS Appl Mater Interfaces* **2017**, 9, 32008.
- [14] T. Liu, G. Zhang, R. E. Evans, C. O. Trindle, Z. Altun, C. A. DeRosa, F. Wang, M. Zhuang, C. L. Fraser, *Chemistry* **2018**, 24, 1859.
- [15] M. Kolpaczynska, C. A. DeRosa, W. A. Morris, C. L. Fraser, *Australian journal of chemistry* **2016**, 69, 537.
- [16] C. A. DeRosa, M. L. Daly, C. Kerr, C. L. Fraser, *ChemPhotoChem* **2018**, 3, 31.
- [17] R. Gao, X. Fang, D. Yan, *Journal of Materials Chemistry C* **2018**, 6, 4444.
- [18] H. Wu, W. Chi, Z. Chen, G. Liu, L. Gu, A. K. Bindra, G. Yang, X. Liu, Y. Zhao, *Advanced Functional Materials* **2019**, 29.
- [19] H. Wu, L. Gu, G. V. Baryshnikov, H. Wang, B. F. Minaev, H. Agren, Y. Zhao, *ACS Appl Mater Interfaces* **2020**, 12, 20765.
- [20] a)S. Kuila, S. J. George, *Angew Chem Int Ed Engl* **2020**, 59, 9393; b)S. Kuila, S. Garain, S. Bandi, S. J. George, *Advanced Functional Materials* **2020**, 30.
- [21] Y. Su, S. Z. F. Phua, Y. Li, X. Zhou, D. Jana, G. Liu, W. Q. Lim, W. K. Ong, C. Yang, Y. Zhao, *Science advances* **2018**, 4, eaas9732.
- [22] Y. Zhang, L. Gao, X. Zheng, Z. Wang, C. Yang, H. Tang, L. Qu, Y. Li, Y. Zhao, *Nat Commun* **2021**, 12, 2297.
- [23] Y. Su, Y. Zhang, Z. Wang, W. Gao, P. Jia, D. Zhang, C. Yang, Y. Li, Y. Zhao, *Angew Chem Int Ed Engl* **2020**, 59, 9967.

- [24] Z. Wang, Y. Zhang, C. Wang, X. Zheng, Y. Zheng, L. Gao, C. Yang, Y. Li, L. Qu, Y. Zhao, *Adv Mater* **2020**, 32, e1907355.
- [25] H. Wu, D. Wang, Z. Zhao, D. Wang, Y. Xiong, B. Z. Tang, *Advanced Functional Materials* **2021**, 31.
- [26] Y. Yang, Y. Liang, Y. Zheng, J. A. Li, S. Wu, H. Zhang, T. Huang, S. Luo, C. Liu, G. Shi, F. Sun, Z. Chi, B. Xu, *Angew Chem Int Ed Engl* **2022**.
- [27] Z. Wang, L. Gao, Y. Zheng, Y. Zhu, Y. Zhang, X. Zheng, C. Wang, Y. Li, Y. Zhao, C. Yang, *Angew Chem Int Ed Engl* **2022**.
- [28] W. Tao, Y. Zhou, F. Lin, H. Gao, Z. Chi, G. Liang, *Advanced Optical Materials* **2022**.
- [29] Y. Zhang, Y. Su, H. Wu, Z. Wang, C. Wang, Y. Zheng, X. Zheng, L. Gao, Q. Zhou, Y. Yang, X. Chen, C. Yang, Y. Zhao, *J Am Chem Soc* **2021**, 143, 13675.
- [30] Y. Yang, J. Wang, D. Li, J. Yang, M. Fang, Z. Li, *Adv Mater* **2021**, e2104002.
- [31] Y. Li, L. Jiang, W. Liu, S. Xu, T. Y. Li, F. Fries, O. Zeika, Y. Zou, C. Ramanan, S. Lenk, R. Scholz, D. Andrienko, X. Feng, K. Leo, S. Reineke, *Adv Mater* **2021**, e2101844.
- [32] R. Chen, Y. Guan, H. Wang, Y. Zhu, X. Tan, P. Wang, X. Wang, X. Fan, H. L. Xie, *ACS Appl Mater Interfaces* **2021**, 13, 41131.
- [33] a)M. Gmelch, H. Thomas, F. Fries, S. Reineke, *Science advances* **2019**, 5, eaau7310; b)A. Kirch, M. Gmelch, S. Reineke, *J Phys Chem Lett* **2019**, 10, 310.
- [34] F. Lin, H. Wang, Y. Cao, R. Yu, G. Liang, H. Huang, Y. Mu, Z. Yang, Z. Chi, *Adv Mater* **2022**, e2108333.
- [35] D. Li, Y. Yang, J. Yang, M. Fang, B. Z. Tang, Z. Li, *Nat Commun* **2022**, 13, 347.
- [36] Y. Zhu, Y. Guan, Y. Niu, P. Wang, R. Chen, Y. Wang, P. Wang, H. L. Xie, *Advanced Optical Materials* **2021**, 9.
- [37] B. Zhao, S. Yang, X. Yong, J. Deng, *ACS Appl Mater Interfaces* **2021**, 13, 59320.
- [38] S. Cai, H. Ma, H. Shi, H. Wang, X. Wang, L. Xiao, W. Ye, K. Huang, X. Cao, N. Gan, C. Ma, M. Gu, L. Song, H. Xu, Y. Tao, C. Zhang, W. Yao, Z. An, W. Huang, *Nat Commun* **2019**, 10, 4247.
- [39] T. Ogoshi, H. Tsuchida, T. Kakuta, T. a. Yamagishi, A. Taema, T. Ono, M. Sugimoto, M. Mizuno, *Advanced Functional Materials* **2018**, 28.
- [40] a)G. Zhang, J. Chen, S. J. Payne, S. E. Kooi, J. Demas, C. L. Fraser, *Journal of the American Chemical Society* **2007**, 129, 8942; b)G. Zhang, G. M. Palmer, M. W. Dewhirst, C. L. Fraser, *Nat Mater* **2009**, 8, 747.
- [41] L. Gu, H. Wu, H. Ma, W. Ye, W. Jia, H. Wang, H. Chen, N. Zhang, D. Wang, C. Qian, Z. An, W. Huang, Y. Zhao, *Nat Commun* **2020**, 11, 944.
- [42] X. Dou, T. Zhu, Z. Wang, W. Sun, Y. Lai, K. Sui, Y. Tan, Y. Zhang, W. Z. Yuan, *Adv Mater* **2020**, 32, e2004768.
- [43] H. Peng, G. Xie, Y. Cao, L. Zhang, X. Yan, X. Zhang, S. Miao, Y. Tao, H. Li, C. Zheng, *Science advances* **2022**, 8, eabk2925.
- [44] R. Goddard, M. W. Haenel, W. C. Herndon, C. Krueger, M. Zander, *Journal of the American Chemical Society* **1995**, 117, 30.
